# Supplementary material for: A network-based conditional genetic association analysis of the human metabolome
Source: PubMed Central journal article supplement (PMC6287100; doi:10.1093/gigascience/giy137), 2018-11-29
Supplement: giy137_giga-d-17-00337_revision_1.pdf [file giy137_giga-d-17-00337_revision_1.pdf]

|                                                      |                                                                                                                                                                                                                                                                                                                                                                                                                                                                                                                                                                                                                                                                                                                                                                                                                                                                                                                                                                                                                                                                                                                                                                                                                                                                                                                                                                                                                                                                                                                                                                                                                                                                                                                                                                                                                                                                                                                                                                                                                                                                                                                                                                                                                                                                  |                          |
|------------------------------------------------------|------------------------------------------------------------------------------------------------------------------------------------------------------------------------------------------------------------------------------------------------------------------------------------------------------------------------------------------------------------------------------------------------------------------------------------------------------------------------------------------------------------------------------------------------------------------------------------------------------------------------------------------------------------------------------------------------------------------------------------------------------------------------------------------------------------------------------------------------------------------------------------------------------------------------------------------------------------------------------------------------------------------------------------------------------------------------------------------------------------------------------------------------------------------------------------------------------------------------------------------------------------------------------------------------------------------------------------------------------------------------------------------------------------------------------------------------------------------------------------------------------------------------------------------------------------------------------------------------------------------------------------------------------------------------------------------------------------------------------------------------------------------------------------------------------------------------------------------------------------------------------------------------------------------------------------------------------------------------------------------------------------------------------------------------------------------------------------------------------------------------------------------------------------------------------------------------------------------------------------------------------------------|--------------------------|
| <b>Manuscript Number:</b>                            | GIGA-D-17-00337R1                                                                                                                                                                                                                                                                                                                                                                                                                                                                                                                                                                                                                                                                                                                                                                                                                                                                                                                                                                                                                                                                                                                                                                                                                                                                                                                                                                                                                                                                                                                                                                                                                                                                                                                                                                                                                                                                                                                                                                                                                                                                                                                                                                                                                                                |                          |
| <b>Full Title:</b>                                   | A network-based conditional genetic association analysis of the human metabolome                                                                                                                                                                                                                                                                                                                                                                                                                                                                                                                                                                                                                                                                                                                                                                                                                                                                                                                                                                                                                                                                                                                                                                                                                                                                                                                                                                                                                                                                                                                                                                                                                                                                                                                                                                                                                                                                                                                                                                                                                                                                                                                                                                                 |                          |
| <b>Article Type:</b>                                 | Technical Note                                                                                                                                                                                                                                                                                                                                                                                                                                                                                                                                                                                                                                                                                                                                                                                                                                                                                                                                                                                                                                                                                                                                                                                                                                                                                                                                                                                                                                                                                                                                                                                                                                                                                                                                                                                                                                                                                                                                                                                                                                                                                                                                                                                                                                                   |                          |
| <b>Funding Information:</b>                          | the European Union FP7 framework project Pain-Omics (602736)                                                                                                                                                                                                                                                                                                                                                                                                                                                                                                                                                                                                                                                                                                                                                                                                                                                                                                                                                                                                                                                                                                                                                                                                                                                                                                                                                                                                                                                                                                                                                                                                                                                                                                                                                                                                                                                                                                                                                                                                                                                                                                                                                                                                     | Dr. Christian Gieger     |
|                                                      | Ministry of Education and Science of the Russian Federation (the 5-100 Excellence Programme)                                                                                                                                                                                                                                                                                                                                                                                                                                                                                                                                                                                                                                                                                                                                                                                                                                                                                                                                                                                                                                                                                                                                                                                                                                                                                                                                                                                                                                                                                                                                                                                                                                                                                                                                                                                                                                                                                                                                                                                                                                                                                                                                                                     | Mr. Sodbo Zh. Sharapov   |
|                                                      | the Federal Agency of Scientific Organisations via the Institute of Cytology and Genetics (0324-2018-0017)                                                                                                                                                                                                                                                                                                                                                                                                                                                                                                                                                                                                                                                                                                                                                                                                                                                                                                                                                                                                                                                                                                                                                                                                                                                                                                                                                                                                                                                                                                                                                                                                                                                                                                                                                                                                                                                                                                                                                                                                                                                                                                                                                       | Dr. Yakov A. Tsepilov    |
|                                                      | the Federal Agency of Scientific Organisations via the Institute of Cytology and Genetics (0324-2018-0017)                                                                                                                                                                                                                                                                                                                                                                                                                                                                                                                                                                                                                                                                                                                                                                                                                                                                                                                                                                                                                                                                                                                                                                                                                                                                                                                                                                                                                                                                                                                                                                                                                                                                                                                                                                                                                                                                                                                                                                                                                                                                                                                                                       | Prof. Yurii S. Aulchenko |
| <b>Abstract:</b>                                     | <p><b>Background:</b> Genome-wide association studies have identified hundreds of loci that influence a wide variety of complex human traits; however, little is known regarding the biological mechanism of action of these loci. The recent accumulation of functional genomics (“omics”), including metabolomics data, has created new opportunities for studying the functional role of specific changes in the genome. Functional genomic data are characterized by their high dimensionality, the presence of (strong) statistical dependency between traits, and—potentially—complex genetic control. Therefore, the analysis of such data requires specific statistical genetics methods.</p> <p><b>Results:</b> To facilitate our understanding of the genetic control of omics phenotypes, we propose a trait-centered, network-based conditional genetic association (cGAS) approach for identifying the direct effects of genetic variants on omics-based traits. For each trait of interest, we selected from a biological network a set of other traits to be used as covariates in the cGAS. The network can be reconstructed either from biological pathway databases (a mechanistic approach) or directly from the data, using a Gaussian Graphical Model applied to the metabolome (a data-driven approach). We derived mathematical expressions which allow comparison of the power of univariate analyses with conditional genetic association analyses. We then tested our approach using data from a population-based KORA study (n=1784 subjects, 1.7 million SNPs) with measured data for 151 metabolites.</p> <p><b>Conclusions:</b> We found that compared to single-trait analysis, performing a genetic association analysis that includes biologically relevant covariates can either gain or lose power, depending on specific pleiotropic scenarios, for which we provide empirical examples. In the context of analyzed metabolomics data, the mechanistic network approach had more power compared to the data-driven approach. Nevertheless, we believe that our analysis shows that neither a prior-knowledge-only approach nor a phenotypic-data-only approach is optimal, and we discuss possibilities for improvement.</p> |                          |
| <b>Corresponding Author:</b>                         | Yurii Aulchenko<br>Institute of Cytology and Genetics SB RAS<br>Novosibirsk, RUSSIAN FEDERATION                                                                                                                                                                                                                                                                                                                                                                                                                                                                                                                                                                                                                                                                                                                                                                                                                                                                                                                                                                                                                                                                                                                                                                                                                                                                                                                                                                                                                                                                                                                                                                                                                                                                                                                                                                                                                                                                                                                                                                                                                                                                                                                                                                  |                          |
| <b>Corresponding Author Secondary Information:</b>   |                                                                                                                                                                                                                                                                                                                                                                                                                                                                                                                                                                                                                                                                                                                                                                                                                                                                                                                                                                                                                                                                                                                                                                                                                                                                                                                                                                                                                                                                                                                                                                                                                                                                                                                                                                                                                                                                                                                                                                                                                                                                                                                                                                                                                                                                  |                          |
| <b>Corresponding Author's Institution:</b>           | Institute of Cytology and Genetics SB RAS                                                                                                                                                                                                                                                                                                                                                                                                                                                                                                                                                                                                                                                                                                                                                                                                                                                                                                                                                                                                                                                                                                                                                                                                                                                                                                                                                                                                                                                                                                                                                                                                                                                                                                                                                                                                                                                                                                                                                                                                                                                                                                                                                                                                                        |                          |
| <b>Corresponding Author's Secondary Institution:</b> |                                                                                                                                                                                                                                                                                                                                                                                                                                                                                                                                                                                                                                                                                                                                                                                                                                                                                                                                                                                                                                                                                                                                                                                                                                                                                                                                                                                                                                                                                                                                                                                                                                                                                                                                                                                                                                                                                                                                                                                                                                                                                                                                                                                                                                                                  |                          |
| <b>First Author:</b>                                 | Yakov A. Tsepilov, Ph.D.                                                                                                                                                                                                                                                                                                                                                                                                                                                                                                                                                                                                                                                                                                                                                                                                                                                                                                                                                                                                                                                                                                                                                                                                                                                                                                                                                                                                                                                                                                                                                                                                                                                                                                                                                                                                                                                                                                                                                                                                                                                                                                                                                                                                                                         |                          |
| <b>First Author Secondary Information:</b>           |                                                                                                                                                                                                                                                                                                                                                                                                                                                                                                                                                                                                                                                                                                                                                                                                                                                                                                                                                                                                                                                                                                                                                                                                                                                                                                                                                                                                                                                                                                                                                                                                                                                                                                                                                                                                                                                                                                                                                                                                                                                                                                                                                                                                                                                                  |                          |

|                                                |                                                                                                                                                                                                                                                                                                                                                                                                                                                                                                                                                                                                                                                                                                                                                                                                                                                                                                                                                                                                                                                                                                                                                                                                                                                                                                                                                                                                                                                                                                                                                                                                                                                                                                                                                                                                                                                                                                                                                                                                                                                                                                                                                                                                                                                                                                                                                                                                                                                                                                                                                                                                                                                                                                                                                                                                                                                                                                  |
|------------------------------------------------|--------------------------------------------------------------------------------------------------------------------------------------------------------------------------------------------------------------------------------------------------------------------------------------------------------------------------------------------------------------------------------------------------------------------------------------------------------------------------------------------------------------------------------------------------------------------------------------------------------------------------------------------------------------------------------------------------------------------------------------------------------------------------------------------------------------------------------------------------------------------------------------------------------------------------------------------------------------------------------------------------------------------------------------------------------------------------------------------------------------------------------------------------------------------------------------------------------------------------------------------------------------------------------------------------------------------------------------------------------------------------------------------------------------------------------------------------------------------------------------------------------------------------------------------------------------------------------------------------------------------------------------------------------------------------------------------------------------------------------------------------------------------------------------------------------------------------------------------------------------------------------------------------------------------------------------------------------------------------------------------------------------------------------------------------------------------------------------------------------------------------------------------------------------------------------------------------------------------------------------------------------------------------------------------------------------------------------------------------------------------------------------------------------------------------------------------------------------------------------------------------------------------------------------------------------------------------------------------------------------------------------------------------------------------------------------------------------------------------------------------------------------------------------------------------------------------------------------------------------------------------------------------------|
| <b>Order of Authors:</b>                       | <p>Yakov A. Tsepilov, Ph.D.</p> <p>Sodbo Zh. Sharapov</p> <p>Olga O. Zaytseva, Ph.D.</p> <p>Jan Krumsek, Ph.D.</p> <p>Cornelia Prehn, Ph.D.</p> <p>Jerzy Adamski, Ph.D.</p> <p>Gabi Kastenmüller, Ph.D.</p> <p>Rui Wang-Sattler, Ph.D.</p> <p>Konstantin Strauch, Ph.D.</p> <p>Christian Gieger, Ph.D.</p> <p>Yurii S. Aulchenko, Ph.D.</p>                                                                                                                                                                                                                                                                                                                                                                                                                                                                                                                                                                                                                                                                                                                                                                                                                                                                                                                                                                                                                                                                                                                                                                                                                                                                                                                                                                                                                                                                                                                                                                                                                                                                                                                                                                                                                                                                                                                                                                                                                                                                                                                                                                                                                                                                                                                                                                                                                                                                                                                                                      |
| <b>Order of Authors Secondary Information:</b> |                                                                                                                                                                                                                                                                                                                                                                                                                                                                                                                                                                                                                                                                                                                                                                                                                                                                                                                                                                                                                                                                                                                                                                                                                                                                                                                                                                                                                                                                                                                                                                                                                                                                                                                                                                                                                                                                                                                                                                                                                                                                                                                                                                                                                                                                                                                                                                                                                                                                                                                                                                                                                                                                                                                                                                                                                                                                                                  |
| <b>Response to Reviewers:</b>                  | <p>Dear Hans,</p> <p>We would like to thank you and reviewers for helpful comments and suggestions. Please find attached our point-by-point answers below. We revised our manuscript accordingly. We hope that you and the reviewers will find the revised manuscript suitable for publication in GigaScience.</p> <p>We must note that while implementing the reproducible workflow and answering the comments and suggestions from the reviewers we have detected and corrected several inconsistencies between our actual current numbers and few numbers reported in the manuscript. Our conclusions were not affected by these occasional changes.</p> <p>Yours Sincerely, also on behalf of other authors,<br/>prof. Yurii Aulchenko and dr. Yakov Tsepilov</p> <p>Editor's comments:</p> <p>1)In particular, reviewer 1 highlights a couple of issues that require more clarity and statistical rigor, for example regarding the two data models, cGAS vs. uGAS.</p> <p>We carefully revised manuscript according to the comments of Reviewer #1 and made necessary clarifications and corrections (see our answers below).</p> <p>2)Along similar lines, reviewer 2 feels the text is hard to follow and should be revised to be more accessible, also to readers who don't have specific expertise in this area (please see the two reports below for details).</p> <p>We extended the text of the manuscript with additional explanations and clarifications according to Reviewer's suggestions (see answers below).</p> <p>3)I also agree with point #7 of reviewer that a reproducible workflow (with code and summary data) would be most helpful and would add value to your manuscript. Providing data and code in reproducible and re-usable formats is one of our major goals at GigaScience. We recently started a collaboration with the code sharing platform "Code Ocean" (<a href="https://codeocean.com/">https://codeocean.com/</a>). Code submitted to Code Ocean is assigned a Digital Object Identifier, and via a DOI it can be easily and stably referenced in your GigaScience article. To learn more about Code Ocean integration, please read our blog post ... Please consider to provide your workflow and data in an easily executable format. I feel this could also help to answer some of the reviewers' concerns. If you have further questions regarding Code Ocean integration please don't hesitate to get in touch.</p> <p>Thank you for this suggestion! We designed reproducible workflow and made it available through the CodeOcean platform, as suggested. The link to the workflow is: <a href="https://codeocean.com/2018/04/02/a-network-based-conditional-genetic-association-analysis-of-the-human-metabolome/">https://codeocean.com/2018/04/02/a-network-based-conditional-genetic-association-analysis-of-the-human-metabolome/</a></p> |

Reviewer reports:

Reviewer #1:

1) One major issue I see is the way the authors claim that a cGAS would usually have higher power. In general, power is defined in relation to a specific null hypothesis and the null hypothesis is different for the uGAS versus the cGAS. For example, the higher power may be at the cost of a higher type I error/FWER. Furthermore, all these claims are made based on a single data analysis, whereas more convincing and illustrative arguments generally would also include simulations where the true data-generating mechanisms is known - for example, if the data follows the uGAS models, how does using the cGAS impact the type I error/FWER as well as the power?

We agree that, strictly speaking, the null hypotheses for uGAS and cGAS are different. uGAS test compares a model where mean, genetic effect, and residual variance are estimated with the (null) model where genetic effect is set to zero, while all other parameters are estimated. cGAS test compares a model where mean, genetic effect, effects of covariates, and residual variance are estimated with the (null) model where genetic effect is set to zero, while all other parameters are estimated. However, for both uGAS and cGAS tests, the difference between the number of parameters estimated under the null and under the alternative is one, and, according to Neyman-Pearson lemma, both uGAS and cGAS tests should -- under the null hypothesis -- follow the chi-square distribution with 1 degree of freedom. The fact that each of the tests is distributed as chi-squared with 1df under the null can be supported by observation that both for uGAS and GGM-cGAS lambda GC varied from 0.98 to 1.05. Further, to support our reasoning that both uGAS and cGAS tests are distributed in the same manner under the null, we compared the Genomic control inflation factor Lambda between uGWAS and GGM-cGAS, for all 151 metabolites. The difference between these was not significant (t-test p-value=0.08), with Lambda greater in case of uGAS than in case of cGAS for 81 out of 151 metabolites (Wilcoxon paired samples t-test p=0.14). In our opinion, these results are convincingly demonstrating that the assumption that the uGAS and cGAS test statistics (under the null) follow the same distribution, and this distribution is a chi-squared with 1df, is valid.

2) The authors do not differentiate between random variables and their estimators in the manuscript.

Thank you for attracting out attention to this; we carefully revised manuscript and corrected our notation.

3) The approaches used could be described more clearly and the notation could be more consistent and intuitive. For example, for equation (1), it seems like  $\beta_{yg}$  is simply the estimate of  $\beta_g$  from the conditional model. This is generally denoted by  $\hat{\beta}_g$  - the authors could denote it by  $\hat{\beta}^c_g$  since they consider both the unconditional and conditional models; using non-standard notation makes the manuscript more difficult to follow. It also seems like  $\beta_{yc}$  is in fact equal to  $\rho_{yc}$  (under the assumption of zero mean and standard deviation of 1 for all the random variables) for the case of a single covariate. If so, this could be pointed out to the readers. The terminology is also not always consistent, eg "partial regression coefficients," "partial correlation coefficients," "partial coefficients of regression" etc. The "total observed correlation" is introduced in the discussion - presumably this is just the marginal correlation, but this term is not used elsewhere.

You are right. We now re-formulated text on p. 7 in order to avoid excessive indexes and to make the relation between different parameters and notations we use clearer. We also corrected the terminology we use throughout the manuscript.

4) The authors claim on page 7 that "Because the noise component [...] is always  $\geq 1$ , any possible decrease in the ratio... is determined by the sign and magnitude of the term [...]. If this term is negative, there will always be an increase in power of the conditional analysis." However, the conditional analysis will necessarily estimate more parameters, using up more degrees of freedom. This becomes clear if one specifies that the t-test is used, for which the degrees of freedom decreases with the number of parameters. (In the discussion, the non-centrality parameter is mentioned - presumably

for the t-test - but not the number of degrees of freedom.)

Here, we see two statements, which we will address separately.

First, we agree that “the conditional analysis will necessarily estimate more parameters, using up more degrees of freedom”. This, coupled with the fact that the univariate and the conditional models are hierarchical, is exactly the reason why the noise component is always  $\geq 1$ . We now make this reasoning more clear in the text on p.7.

Second, you say that “This becomes clear if one specifies that the t-test is used, for which the degrees of freedom decreases with the number of parameters. (In the discussion, the non-centrality parameter is mentioned - presumably for the t-test - but not the number of degrees of freedom.)”. We are not using the t-test anywhere, but we rather use the Wald test that is distributed as chi-squared with one degree of freedom under the null. Again, we make this explicit on p. 7 now. The non-centrality parameter mentioned in Discussion relates to the non-centrality parameter of the Wald test under the alternative; we now change that to “log-ratio between the cGAS and uGAS tests” to avoid excessive notation.

Finally, while this is not explicitly stated, your first statement may suggest that the distribution of the log-ratio (that we use as an indicator of power advantage of the conditional vs. univariate model) may be shifted from zero. Both test statistics which are included in the log-ratio are distributed as chi-squared with 1df under the null, and our expectation is that on average, under the null, the log-ratio between them will be centered at zero (even if covariates  $c$  are significantly associated with outcome  $y$ ). We empirically test this assumption by randomly sampling 10,000 SNPs for each trait and computing the  $\log(T^2_c/T^2_u)$ . Then, we tested whether this quantity is significantly different from zero, using the paired t-test and the Wilcoxon sign test. For each of the 151 traits, we found that the average log-ratio was close to zero (on average, the mean was 0.002; the proportion of log-ratios  $>0$  was equal to 0.5006; the proportion of t-test having  $p < 0.1$  was  $15/151 = 0.0993$ ; the proportion of  $p < 0.05$  was  $8/151 = 0.053$ ).

5)The authors mention that one might be able to apply "a machine-learning approach that allows for differential shrinkage." It is unclear why they do not just apply something like a grouped LASSO (or even a regular LASSO that does not shrink the genotype) and compare the results?

This is an interesting suggestion; however, it is out of the scope of this work, which explored two network-based approaches, one of which learns from the data, and other is based on prior knowledge. Your suggestion would lead to another, not network-based, way to analyze highly dimensional omics data; while this may be interesting, we see this as potentially separate big problem (e.g., developing a LASSO model that does not shrink some of the parameters, and that operates on summary level data, in our view, would be not trivial).

6)The portions on the chi-squared test are confusing. As written, it is somewhat confusing where this test was used (and why) and where the paired Wilcoxon was used (presumably the pairs represent the uGAS and cGAS models for each metabolite?)

Thank you for pointing this out. We used the ratio of the chi-squared tests to provide what we see as an “intuitive” measure of average gain (loss) of power, while testing whether this gain was statistically significant was done using non-parametric Wilcoxon test. We now make it clear the first time we apply this logic (lines 227-230 of previous version, L242-244 in current manuscript).

7)Having a reproducible workflow which includes both the data (summary-level KORA data) and the code would be very helpful to the reader.

As suggested by you and the editor we made available our scripts and summary data necessary for reproducing the results of work (in “push the button - get results” format) on the CodeOcean platform. The link to the workflow is <https://codeocean.com/2018/04/02/a-network-based-conditional-genetic-association->

analysis-of-the-human-metabolome/code .

8)a) It would be helpful to highlight locus FADS1 in Figure 1.

Done.

9)b) It would be helpful to use the notations introduced earlier in the caption of Figure 2, to make it easier to make the connections.

Done. Now we are using the term “partial regression coefficient” throughout the text.

Reviewer #2:

10) 1. It was not clear to me how different the proposed approach is from that of ref 15 which presents the conditional analysis method. As far as I can see, the basic idea is the same, but perhaps the way the covariates are selected is the key contribution here?

The central topic of the work [15] is the mathematical methodology allowing for conditional analysis based on summary-level data, and generalisation of this methodology to the case of multiple SNPs. Authors of [15] provide several numerical examples, but they do detail the implications and relevance of the model in general genetic and specific biological context. They also do not discuss the question of selection of covariates.

We use the same conditional model, as described by reference [15], and our summary-level-based implementation of the model and corresponding tests is very similar. We are not saying that “we build upon the work of [15]” because in fact we have developed the part of the method we use in parallel and in fact, published it first (see our biorxiv paper from Dec 2016 at <https://www.biorxiv.org/content/early/2016/12/27/096982>, while the paper [15] was published in May 2017). We take this approach one step further by analytical analysis and identification of scenarios where one should expect gain or loss in power when compared with a model without covariates, and we discuss biological plausibility of different models; we apply the developed methods to real data and identify real examples of these models. The biological and genetic context aside, the main methodological difference between our current work and [15] is indeed, as you rightly noticed, the (network-based) way we select covariates for the model. We now make these similarities more explicit in Introduction.

11) 2. I find the general message of the paper rather unsurprising - that including other traits as covariates improves the model or its interpretation. Surely anyone would expect this to be the case? Perhaps the authors can make a clearer and more focused conclusion based on the novelty they are bringing to the work.

Thank you for this comment. Indeed, one of the general messages of our work is that “including other traits as covariates improves [the model's] interpretation”, and indeed, this is expected. However, the statement that “including other traits as covariates improves model” is not a part of our message. Somewhat contradictory, and not entirely expected, our message in the context of testing of genetic effects is that adding other (biologically related) traits as covariates may increase or decrease the power, depending on interplay between the pleiotropic architecture of the locus being tested and the residual environmental and genetic factors. We now try to make our message more explicit in the Abstract and the Short Abstract.

12) 3. Lines 160-162. Please explain for readers not familiar with the approach, why  $T_c$  depends on  $\beta_{yg}$  while  $T_u$  depends on  $\rho_{yg}$  (not  $\beta$ ). Also the derivation of expressions for  $T_c$  in line 162 could do with being a little more explicit I think.

Thank you for this comment. We added necessary clarifications in text L160-171. Given the assumptions that all random variables are distributed with a mean of zero and a standard deviation of 1, the joint distribution of  $y$ ,  $g$ , and  $c$  can be specified using a set of three correlation coefficients,  $\rho_{yg}$  (correlation between the trait and the genotype),  $\rho_{cg}$  (between the covariate and the trait), and  $\rho_{yc}$  (between the trait and the covariate). In case of uGAS  $\beta_{yg}$  (denoted as  $\beta_{yg}$  in previous version) is equivalent to the  $\rho_{yg}$ . In case of conditional model  $\beta_{yg}$  is not equivalent to

$\rho_{yg}$ , but  $\beta_y = \rho_{yg} - \beta_c \rho_{cg}$ . For both  $T^2_c$  and  $T^2_u$  we used the Wald test of significance of deviation from zero.

We now make it explicit and introduce more explanation and a reference on page 7.

13) 4. The reasoning behind the discussion of the pleiotropic component - lines 173-185 is not clear to me and I think could be made more explicit. For example, those not familiar with Medelian randomization studies may not follow the first sentence. Why is  $\beta_{yc}$  'mostly environmental'? Why would it be 'unexpected' for the genotype and environmental effects to be of different signs? This may be obvious to the authors, but I doubt to the general reader.

Thank you for these comments. To account for them, we added more explanation and details to the text of Results (L188-189) and also to the discussion (L384-400).

14) 5. Line 233 'As shown in figure 1, the ratio is determined primarily by the second (ie pleiotropic) term in Eq (2)'. Presumably the authors are drawing this conclusion from the slope of the pleiotropic and noise regression lines in the figure? Please make this reasoning explicit.

Thank you for pointing this out. You right, we made this conclusion primarily from these slopes. We added explanation into the text (L247-248).

15) 6. Figure 1:

a. Please label the regression line going through the asterisks.

Done.

b. Caption: "on the y axis the asterisk corresponds to the log-ratio" - of what?

Of the log-ratio of cGAS and uGAS T2 statistics. We have now corrected it, thank you!

c. "The three dark green vertical lines". There are 4 dark green vertical lines.

Indeed. It was typo. We have now corrected it, thank you!

d. I am confused. There are 4 dark green vertical lines which are the "associations significant in cGAS but not uGAS". But table 1 shows only two associations of this type. Similarly there are 2 dark red lines which are associations "only significant in uGAS" but table 1 shows only 1 association of this type.

Green lines correspond to the SNP-trait pairs for which association was significant in cGAS but not in uGAS. It is true that we have two loci found to be significant only in cGAS (locus # 10 and #11 in table1), but also we have two SNP-trait pairs in each of the loci #1 and #2. These loci also have another SNP-traits pairs that were significant in uGAS, but for different traits. In the Figure, we show all of them. The same explains the number of red lines.

16) 7. For completeness it would be helpful to list the estimated pleiotropic and noise component terms in tables 1 & 2 for each locus.

Thank you for this suggestion. We have added corresponding column into the tables.

17) 8. Figure 2: I find this hard to follow:

a. "the first column below the diagonal line" What does this mean? I guess just the first column on the left?

Indeed, this is the first column; we have now corrected the sentence.

b. Do the areas of the squares and their colours represent different quantities?

No, they all correspond to the value of correlations. The area of a square is proportional to the absolute value of correlation (partial regression coefficient); the effect magnitude is also reflected by square's color (the scale provided at the bottom of

|  |                                                                                                                                                                                                                                                                                                                                                                                                                                                                                                                                                                                                                                                                                                                                                                                                                                                                                                                                                                                                                                                                                                                                                                                                                                                                                                                                                                                                                                                                                                                                                                                                                                                                                                                                                                                                                                                                                                                                                                                                                                                                                                                                                                                                                                                                                                                                           |
|--|-------------------------------------------------------------------------------------------------------------------------------------------------------------------------------------------------------------------------------------------------------------------------------------------------------------------------------------------------------------------------------------------------------------------------------------------------------------------------------------------------------------------------------------------------------------------------------------------------------------------------------------------------------------------------------------------------------------------------------------------------------------------------------------------------------------------------------------------------------------------------------------------------------------------------------------------------------------------------------------------------------------------------------------------------------------------------------------------------------------------------------------------------------------------------------------------------------------------------------------------------------------------------------------------------------------------------------------------------------------------------------------------------------------------------------------------------------------------------------------------------------------------------------------------------------------------------------------------------------------------------------------------------------------------------------------------------------------------------------------------------------------------------------------------------------------------------------------------------------------------------------------------------------------------------------------------------------------------------------------------------------------------------------------------------------------------------------------------------------------------------------------------------------------------------------------------------------------------------------------------------------------------------------------------------------------------------------------------|
|  | <p>the graph).</p> <p>c. The text compares the conditional and unconditional analyses with respect to Fig 2. Are the results of the unconditional regression represented in the plot? If not, where?</p> <p>Thank you for pointing this out. The matrix of correlations (above diagonal line) shows only the results of the univariate regression. We have arranged a new Supplementary Table (1C) summarizing univariate results for corresponding traits and SNPs for this figure.</p> <p>18) 9. Line 298: In the GGM-cGAS study, the noise component was found to be larger than BN-cGAS. This seems to be opposite of what was expected?</p> <p>No, the fact that noise component of GGM-cGAS is larger than the one of BN-cGAS was expected. Since GGM-cGAS had on average more covariates than BN-cGAS, and the GGM covariates were specifically selected to explain large proportion of the variance of the trait of interest, it is expected that the residual variance of the dependent variable will be smaller for GGM-cGAS than for BN-cGAS, leading to higher noise component of Eq. 2.</p> <p>19) 10. The acylcarnitines are identified throughout just by their chain lengths (C10 etc). It would be helpful to clarify their chemical class on the plots/tables as well (since there are other classes present).</p> <p>Thank you for this suggestion. We have added a column describing the chemical class of a metabolite into Supplementary Tables 1 and 2.</p> <p>20) 11. Line 334-337 "We found no prior evidence..." Could these be new associations rather than false positives?</p> <p>Taking into account that this association was not found in (much) bigger meta-analysis, it is rather unlikely that these are novel findings. We now indicate this in L349.</p> <p>21) 12. Discussion, line 392: What is DEPICT?</p> <p>Thank you for this question. We now decipher this abbreviation and provide the reference to the DEPICT software in Material and Methods L535: "To prioritize genes in associated regions, gene set enrichment, and tissue/cell-type enrichment analyses, we used DEPICT (Data-driven Expression-Prioritized Integration for Complex Traits) software"</p> <p>22) 13. Methods line 490 typo: "separated by at least 500." 500 *what*? Corrected to "at least 500 kb", thank you!</p> |
|--|-------------------------------------------------------------------------------------------------------------------------------------------------------------------------------------------------------------------------------------------------------------------------------------------------------------------------------------------------------------------------------------------------------------------------------------------------------------------------------------------------------------------------------------------------------------------------------------------------------------------------------------------------------------------------------------------------------------------------------------------------------------------------------------------------------------------------------------------------------------------------------------------------------------------------------------------------------------------------------------------------------------------------------------------------------------------------------------------------------------------------------------------------------------------------------------------------------------------------------------------------------------------------------------------------------------------------------------------------------------------------------------------------------------------------------------------------------------------------------------------------------------------------------------------------------------------------------------------------------------------------------------------------------------------------------------------------------------------------------------------------------------------------------------------------------------------------------------------------------------------------------------------------------------------------------------------------------------------------------------------------------------------------------------------------------------------------------------------------------------------------------------------------------------------------------------------------------------------------------------------------------------------------------------------------------------------------------------------|

|                                                                                                                                                                                                                                                                                                                                                                                   |                 |
|-----------------------------------------------------------------------------------------------------------------------------------------------------------------------------------------------------------------------------------------------------------------------------------------------------------------------------------------------------------------------------------|-----------------|
| <b>Additional Information:</b>                                                                                                                                                                                                                                                                                                                                                    |                 |
| <b>Question</b>                                                                                                                                                                                                                                                                                                                                                                   | <b>Response</b> |
| Are you submitting this manuscript to a special series or article collection?                                                                                                                                                                                                                                                                                                     | No              |
| <b>Experimental design and statistics</b>                                                                                                                                                                                                                                                                                                                                         | Yes             |
| <p>Full details of the experimental design and statistical methods used should be given in the Methods section, as detailed in our <a href="#">Minimum Standards Reporting Checklist</a>. Information essential to interpreting the data presented should be made available in the figure legends.</p> <p>Have you included all the information requested in your manuscript?</p> |                 |

|                                                                                                                                                                                                                                                                                                                                                                                                                                                                                                                                                         |            |
|---------------------------------------------------------------------------------------------------------------------------------------------------------------------------------------------------------------------------------------------------------------------------------------------------------------------------------------------------------------------------------------------------------------------------------------------------------------------------------------------------------------------------------------------------------|------------|
| <p><b>Resources</b></p> <p>A description of all resources used, including antibodies, cell lines, animals and software tools, with enough information to allow them to be uniquely identified, should be included in the Methods section. Authors are strongly encouraged to cite <a href="#">Research Resource Identifiers</a> (RRIDs) for antibodies, model organisms and tools, where possible.</p> <p>Have you included the information requested as detailed in our <a href="#">Minimum Standards Reporting Checklist</a>?</p>                     | <p>Yes</p> |
| <p><b>Availability of data and materials</b></p> <p>All datasets and code on which the conclusions of the paper rely must be either included in your submission or deposited in <a href="#">publicly available repositories</a> (where available and ethically appropriate), referencing such data using a unique identifier in the references and in the “Availability of Data and Materials” section of your manuscript.</p> <p>Have you have met the above requirement as detailed in our <a href="#">Minimum Standards Reporting Checklist</a>?</p> | <p>Yes</p> |



# A network-based conditional genetic association analysis of the human metabolome

Y.A. Tsepilov<sup>1,2</sup>, S.Z. Sharapov<sup>2</sup>, O.O. Zaytseva<sup>1,2</sup>, J. Krumsek<sup>3</sup>, C. Prehn<sup>4</sup>, J. Adamski<sup>4,5,6</sup>, G.  
Kastenmüller<sup>7</sup>, R. Wang-Sattler<sup>6,8,9</sup>, K. Strauch<sup>10,11</sup>, C. Gieger<sup>6,8,9</sup>, Y.S. Aulchenko<sup>1,2,12\*</sup>

1 Institute of Cytology and Genetics SB RAS, Novosibirsk, Russia

2 Novosibirsk State University, Novosibirsk, Russia

3 Institute of Computational Biology, Helmholtz Center Munich - German Research Center  
for Environmental Health, Neuherberg, Germany

4 Institute of Experimental Genetics, Genome Analysis Center, Helmholtz Center Munich -  
German Research Center for Environmental Health, Neuherberg, Germany

5 Institute of Experimental Genetics, Life and Food Science Center Weihenstephan, Technical  
University of Munich, Freising-Weihenstephan, Germany

6 German Center for Diabetes Research, Neuherberg, Germany

7 Institute of Bioinformatics and Systems Biology, Helmholtz Center Munich - German  
Research Center for Environmental Health, Neuherberg, Germany

8 Research Unit of Molecular Epidemiology, Helmholtz Center Munich - German Research  
Center for Environmental Health, Neuherberg, Germany

9 Institute of Epidemiology II, Helmholtz Center Munich - German Research Center for  
Environmental Health, Neuherberg, Germany

10 Institute of Genetic Epidemiology, Helmholtz Center Munich - German Research Center  
for Environmental Health, Neuherberg, Germany

11 Institute of Medical Informatics, Biometry and Epidemiology, Chair of Genetic  
Epidemiology, Ludwig Maximilian University of Munich, Munich, Germany

12 PolyOmica, 's-Hertogenbosch, The Netherlands

\* Correspondence to

Yurii S. Aulchenko

Institute of Cytology and Genetics SB RAS, 630090 Novosibirsk, Russia

[yurii@bionet.nsc.ru](mailto:yurii@bionet.nsc.ru)

*Keywords: genome-wide association study; multivariate model; metabolomics; conditional  
analysis; pleiotropy*

## 38 Abstract

1 39 **Background:** Genome-wide association studies have identified hundreds of loci that influence a  
2 wide variety of complex human traits; however, little is known regarding the biological mechanism  
3 of action of these loci. The recent accumulation of functional genomics (“omics”), including  
4 metabolomics data, has created new opportunities for studying the functional role of specific  
5 changes in the genome. Functional genomic data are characterized by their high dimensionality,  
6 the presence of (strong) statistical dependency between traits, and—potentially—complex genetic  
7 control. Therefore, the analysis of such data requires specific statistical genetics methods.  
8

9 46 **Results:** To facilitate our understanding of the genetic control of omics phenotypes, we propose a  
10 trait-centered, network-based conditional genetic association (cGAS) approach for identifying the  
11 direct effects of genetic variants on omics-based traits. For each trait of interest, we selected from  
12 a biological network a set of other traits to be used as covariates in the cGAS. The network can be  
13 reconstructed either from biological pathway databases (a mechanistic approach) or directly from  
14 the data, using a Gaussian Graphical Model applied to the metabolome (a data-driven approach).  
15 We derived mathematical expressions which allow comparison of the power of univariate analyses  
16 with conditional genetic association analyses. We then tested our approach using data from a  
17 population-based KORA study (n=1784 subjects, 1.7 million SNPs) with measured data for 151  
18 metabolites.  
19

20 56 **Conclusions:** We found that compared to single-trait analysis, performing a genetic association  
21 analysis that includes biologically relevant covariates can either gain or lose power, depending on  
22 specific pleiotropic scenarios, for which we provide empirical examples. In the context of analyzed  
23 metabolomics data, the mechanistic network approach had more power compared to the data-  
24 driven approach. Nevertheless, we believe that our analysis shows that neither a prior-knowledge-  
25 only approach nor a phenotypic-data-only approach is optimal, and we discuss possibilities for  
26 improvement.  
27

28 63

64 **Short abstract**

1 65 We propose a trait-centric network-based conditional approach for performing a genetic  
2  
3 66 association analysis of multivariate omics phenotypes. This approach can incorporate existing  
4  
5 67 biological knowledge regarding biological pathways obtained from external sources and is  
6  
7 68 designed to specifically test for direct genetic effects. We applied this approach to existing  
8  
9 69 metabolomics data and found that **it may have more** power by having increased accuracy of genetic  
10  
11 70 effect estimates in the presence of specific “counterintuitive” pleiotropic scenarios in which **locus-**  
12  
13 71 **specific** genetically induced and residual covariance are opposite, **but it may lose power when**  
14  
15 72 **genetically induced and residual covariance have a concordant sign.** We provide **empirical**  
16  
17 73 examples of different pleiotropic scenarios **that we observed in metabolomics**, and we discuss  
18  
19 74 possible additional applications for this approach.  
20  
21  
22  
23  
24  
25  
26  
27  
28  
29  
30  
31  
32  
33  
34  
35  
36  
37  
38  
39  
40  
41  
42  
43  
44  
45  
46  
47  
48  
49  
50  
51  
52  
53  
54  
55  
56  
57  
58  
59  
60  
61  
62  
63  
64  
65

## 75 **Background**

1 76 Genome-wide association studies (GWASs) are a highly popular method for identifying alleles  
2  
3 77 that affect complex traits in humans, including the risk of common diseases. In the past decade,  
4  
5 78 GWASs have enabled the identification of thousands of loci, significantly increasing our  
6  
7 79 understanding of the genetic basis underlying the control of complex human traits [1]. On the other  
8  
9 80 hand, this has had only a limited impact on the development of biomarkers and therapeutic agents;  
10  
11 81 in most cases, any association found using GWAS approach can only serve as a starting point for  
12  
13 82 future research, rather than providing a direct answer to the question of the genetic region's precise  
14  
15 83 biological function. The recent accumulation of functional genomics (or “omics” for short) data—  
16  
17 84 including information regarding the levels of gene expression (the transcriptome), metabolites (the  
18  
19 85 metabolome), proteins (the proteome), and glycosylation (the glycome)—can provide new insight  
20  
21 86 into the functional role of specific changes in the genome [2,3].

22 87         Metabolomics is an emerging field that has been studied extensively in the past decade. A  
23  
24 88 number of GWASs of metabolites have been performed using various platforms [4–8], revealing  
25  
26 89 literally dozens of loci associated with variations in various lipid species, amino acids, and other  
27  
28 90 small molecules. Linking the variants that underlie these variations in metabolomics with various  
29  
30 91 diseases can provide functional insight into the many disease-related associations that were  
31  
32 92 reported in previous studies, including cardiovascular and kidney disease, type 2 diabetes, cancer,  
33  
34 93 gout, venous thromboembolism, and Crohn's disease [5].

35 94         However, analyzing metabolomics data requires specialized statistical methods due to their  
36  
37 95 characteristically high dimensionality and the presence of statistical dependencies that reflect  
38  
39 96 biological relationships between different variables. Conventional univariate GWAS (uGAS)  
40  
41 97 approaches ignore any possible dependencies between different omics traits, which can confound  
42  
43 98 the biological interpretation of the results and may lead to a loss of statistical power. On the other  
44  
45 99 hand, utilizing multivariate phenotype information increases the statistical power of the association  
46  
47 100 tests compared to univariate analysis [9–12]. Despite a large number of methodological studies,  
48  
49 101 however, only a few empirical multivariate GWASs have been published using data for humans.  
50  
51 102 We recently demonstrated [13] that using a multivariate analysis can substantially increase the  
52  
53 103 power of locus identification in the context of human *N*-glycomics; indeed, not only did our  
54  
55 104 multivariate analysis double the number of loci identified in the analysis sample, but also all five  
56  
57 105 novel loci were strongly replicated. With respect to metabolomics, Inouye et al. [6] performed a  
58  
59 106 multivariate GWAS on 130 metabolites (grouped in 11 sets) measured in approximately 6600  
60  
61 107 individuals. They found that multivariate analysis doubled the number of loci detected in this  
62  
63 108 sample; seven of these additional loci discovered were novel loci that had not been identified

109 previously in other GWAS analyses of related traits. While no replication of novel loci was  
110 performed by Inouye et al., we compared the authors' results with a recently published univariate  
111 GWAS of metabolomics derived from a cohort containing nearly 25,000 individuals [8]. We found  
112 that three of the seven SNPs reported by Inouye et al. have a  $p$ -value  $< 5 \times 10^{-11}$  for at least one  
113 metabolite (i.e., are significant at the genome-wide level after Bonferroni correction for 130  
114 analyses). These findings provide empirical evidence supporting the value of using multivariate  
115 methods to analyze the genomics of metabolic traits, at least in the context of locus discovery.

116 It should be noted that these multivariate methods and tests were developed by statistical  
117 geneticists to specifically increase the power of gene identification. In such "gene-centric" tests,  
118 the model that includes the effects of genotype on multiple traits is contrasted with the null model  
119 in which the gene has no effect on any trait analyzed. Although useful and powerful for genetic  
120 mapping, this approach may have limited interpretability in a context in which one is interested in  
121 the genetic control and biology of specific trait or a subset of traits (the "trait-centered" view).  
122 Several statistical methods have been suggested to address the question of which specific traits are  
123 affected in an analyzed ensemble (see for example [10,14]). One such method is based on  
124 conditional analysis [15], in which a "target trait" is analyzed as a genotype-dependent variable  
125 and related traits are included in the regression model as covariates. Such a modeling approach  
126 allows—at least in theory—one to rule out indirect genetic effects (e.g., effects that are in fact  
127 solely mediated through some other trait) and study only the genetic effects that directly affect the  
128 trait of interest.

129 Here, we present a statistical model in which a given trait depends on a genetic  
130 polymorphism and in which a number of related traits are included in the model as covariates. In  
131 this model, the relationship between the genotype and the trait of interest is our primary focus.  
132 Analyzing such a model allows us to identify the direct effect of genetics on the trait of interest.  
133 **Mathematically, the model is equivalent to the model used by Deng and Pan [15].** We first compare  
134 **this** conditional genetic association (cGAS) approach with the standard model in which a trait of  
135 interest depends solely on genotype, without other traits used as covariates (i.e., the univariate  
136 genetic association—or uGAS—model). We do so by mathematically deriving expressions that  
137 allow us to examine the relative power of the uGAS and cGAS approaches, and we identify the  
138 situations in which these models are expected to yield different results.

139 As might be expected—and as demonstrated here—the choice of covariates plays a critical  
140 role in conditional analyses. First, we used the assumption that the covariates (i.e., biologically  
141 relevant traits) are known. Second, we explored the problem of selecting appropriate covariates,  
142 and we tested the approaches by performing a proof-of-principle study using metabolomics data  
143 consisting of 151 metabolites (Biocrates assay) obtained from the KORA F4 study (n=1785

144 individuals). Specifically, we selected covariates based on existing knowledge from metabolite  
145 biochemical networks (BN-cGAS) and using a data-driven approach based on Gaussian Graphical  
146 Modeling (GGM-cGAS). Finally, we compare and discuss the obtained results, and we discuss  
147 possible applications for this analysis based on biologically and/or statistically relevant traits.  
148  
149

1  
2  
3  
4  
5  
6  
7  
8  
9  
10  
11  
12  
13  
14  
15  
16  
17  
18  
19  
20  
21  
22  
23  
24  
25  
26  
27  
28  
29  
30  
31  
32  
33  
34  
35  
36  
37  
38  
39  
40  
41  
42  
43  
44  
45  
46  
47  
48  
49  
50  
51  
52  
53  
54  
55  
56  
57  
58  
59  
60  
61  
62  
63  
64  
65

## 150 Results

### 151 The power of performing a conditional analysis of genetic associations

152 We start with the theoretical substantiation and identification of specific scenarios in which  
153 adjusting for biologically relevant covariates can modify the power of an association analysis.

154 Let us consider a trait of interest,  $y$ , covariate  $c$ , and genotype  $g$ . We can formulate this  
155 problem in terms of a linear regression as follows:  $y = \mu + \beta_g * g + \beta_c * c + e$ , where  $\beta_g$  and  $\beta_c$   
156 are the effects of the genotype and covariate, respectively, and  $e$  is the residual noise. Without a  
157 loss of generality, we assume that all random variables in this equation are distributed with a mean  
158 of zero and a standard deviation of 1, making (partial) regression coefficients equal to (partial)  
159 correlation coefficients. Given these assumptions made, the joint distribution of  $y$ ,  $g$ , and  $c$  can be  
160 specified using a set of three correlation coefficients,  $\rho_{yg}$  (the correlation between the trait and the  
161 genotype),  $\rho_{cg}$  (the correlation between the covariate and the trait), and  $\rho_{yc}$  (the correlation  
162 between the trait and the covariate). To test the association between  $y$  and  $g$ , we used the Wald  
163 test, which is defined as the square of the ratio between the effect estimate and its standard error,  
164 with the latter estimated under the alternative hypothesis (see [16]). The value of the “univariate”  
165 Wald test statistic is calculated as  $T_u^2 = \frac{n \hat{\rho}_{yg}^2}{\hat{\sigma}_u^2}$ , where  $n$  is the sample size and  $\hat{\sigma}_u^2 = 1 - \hat{\rho}_{yg}^2$  is the  
166 residual variance of  $y$ . For the conditional test, the Wald test is  $T_c^2 = \frac{n \hat{\beta}_g^2}{\hat{\sigma}_c^2}$ , where  $\hat{\beta}_g$  is the partial  
167 correlation between the trait  $y$  and the genotype  $g$  (estimated from the conditional model) and  $\hat{\sigma}_c^2$   
168 is the estimated residual variance of  $y$ . Note that under the null hypothesis, both  $T_u^2$  and  $T_c^2$  have a  
169 chi-square distribution with one degree of freedom.

170 For the conditional model,  $\hat{\beta}_g = \hat{\rho}_{yg} - \hat{\beta}_c \hat{\rho}_{cg}$ ; thus, we can rewrite  $T_c^2 = n(\hat{\rho}_{yg} -$   
171  $\hat{\beta}_c \hat{\rho}_{cg})^2 / \hat{\sigma}_c^2$ . Consequently, the log-ratio of the conditional and univariate test statistics can be  
172 partitioned into two components:

$$173 \log\left(\frac{T_c^2}{T_u^2}\right) = \log\left(\frac{\hat{\sigma}_u^2}{\hat{\sigma}_c^2}\right) + \log\left(\left[1 - \frac{\hat{\beta}_c \hat{\rho}_{cg}}{\hat{\rho}_{yg}}\right]^2\right) \quad (1)$$

174 Because the first term in Eq. (1) is dependent only upon residual variances of the two  
175 models, we call this term the “noise” component. The second term depends upon the correlations  
176 between traits and between the traits and the genotype; we call this term the “pleiotropic”  
177 component. Because the noise component ( $\hat{\sigma}_u^2 / \hat{\sigma}_c^2$ ) is always  $\geq 1$ , any possible decrease in the ratio  
178 between univariate and conditional tests is determined by the sign and the magnitude of the term  
179  $\hat{\beta}_c \hat{\rho}_{cg} / \hat{\rho}_{yg}$ . If this term is negative, there will always be an increase in the power of the conditional  
180 analysis.

181 We can re-write  $\hat{\beta}_c \hat{\rho}_{cg}/\hat{\rho}_{yg}$  as  $\hat{\beta}_c \hat{\rho}_{yc}^*$ , where  $\hat{\rho}_{yc}^* = \hat{\rho}_{cg}/\hat{\rho}_{yg}$  is the component of the  
 182 correlation between trait  $y$  and covariate  $c$ , which is induced by the variation in the genotype  $g$ .  
 183 This quantity takes a central place in a Mendelian randomization analysis, which uses a genetic  
 184 variation to anchor the causality arrow and consequently infers a causal relation between various  
 185 traits (see for example [17]). Note that whereas  $\hat{\rho}_{yc}^*$  reflects the covariance between the trait and  
 186 the covariate induced by the effect of the genotype,  $\hat{\beta}_c$  is conditional on the genotype and is related  
 187 to the residual sources of covariance between  $y$  and  $c$ .

188 In general, the genetically induced covariance and the residual covariance are expected to  
 189 have a concordant sign (see Discussion for details and relevant references). Thus, we conclude  
 190 somewhat surprisingly that when genotype-induced and environmental correlations are similar in  
 191 sign (i.e., both are positive or both are negative), the product  $\hat{\beta}_c \hat{\rho}_{yc}^*$  is positive and the contribution  
 192 of the second term in Eq. (1) to the relative power is negative. Note that the contribution of the  
 193 first term in Eq. (1) is always positive; therefore, even if  $\hat{\beta}_c \hat{\rho}_{yc}^*$  is positive, the power of a  
 194 conditional analysis may still be higher than the power of a univariate analysis. In contrast, an  
 195 “unexpected” product (in which the signs are different and hence  $\hat{\beta}_c \hat{\rho}_{yc}^*$  is negative) contributes  
 196 positively to the relative power of the conditional model. Note that in such a situation, the power  
 197 of a conditional analysis will always be higher than the power of a univariate analysis.

198 We can readily extend Eq. (1) to a situation in which  $k$  covariates are included in the  
 199 conditional model. Denoting the estimated coefficients of correlation between  $g$  and covariate  $i$  as  
 200  $\hat{\rho}_{gi}$  and the estimated partial correlation between  $y$  and covariate  $i$  as  $\hat{\beta}_i$  yields the following  
 201 equation:

$$202 \quad \log\left(\frac{T_c^2}{T_u^2}\right) = \log\left(\frac{\hat{\sigma}_u^2}{\hat{\sigma}_c^2}\right) + \log\left(\left[1 - \frac{1}{\hat{\rho}_{yg}} \sum_{i=1}^k \hat{\beta}_i \hat{\rho}_{gi}\right]^2\right) \quad (2)$$

203 When appropriate covariates are selected, performing cGAS using individual-level data  
 204 becomes rather trivial and can be achieved using standard statistical and software tools in which  
 205 one estimates the effects of a SNP and covariates. However, cGAS becomes somewhat less trivial  
 206 if one chooses to use summary-level univariate GWAS data such as data available from previously  
 207 published studies. The formalization of cGAS in terms of summary univariate GWAS statistics is  
 208 described in **Supplementary Note 1**. Here, we used methods based on analyzing summary-level  
 209 data.

## 210 **Network-based selection of covariates**



212 The ability to select appropriate covariates is extremely important, as it can have direct  
213 implications regarding the outcome of the analysis. If the biological/biochemical relationships  
214 between traits of interest are known and are summarized in a database(s), this knowledge can be  
215 used directly, for example by using all direct neighbors as covariates. We refer to this approach as  
216 a biochemical-network driven cGAS (BN-cGAS). Alternatively, the network can be reconstructed  
217 in a hypothesis-free, empirical manner from the data, for example using a Gaussian Graphical  
218 Model (GGM) [18]. We refer to this approach as a GGM-cGAS.

219 We compared cGAS and uGAS by performing a genome-wide analysis of genetic effects  
220 using summary-level data obtained from the KORA F4 study. This study included 151 metabolites  
221 measured in 1784 individuals using the Biocrates assay and imputed at 1,717,498 SNPs.

222 First, we examined the potential of using cGAS when the covariates are selected based on  
223 a known biochemical network (i.e., BN-cGAS). Thus, our analysis was restricted to a subset of  
224 105 metabolites for which at least the one-reaction-step immediate biochemical neighbors are  
225 known [18]. This biochemical network incorporates only lipid metabolites, and the pathway  
226 reactions cover two groups of pathways: (1) fatty acid biosynthesis reactions, which apply to the  
227 metabolite classes lyso-PC, diacyl-PC, acyl-alkyl-PC, and sphingomyelins; and (2)  $\beta$ -oxidation  
228 reactions that reflect fatty acid degradation and apply to acylcarnitines. The  $\beta$ -oxidation model  
229 consists of a linear chain of C2 degradation steps (C10 to C8 to C6, etc.). The number of covariates  
230 ranged from 1 to 4, with mean and median values of 2.48 covariates and 2 covariates, respectively.

231 **Table 1** lists the 11 loci that were significant in either BN-cGAS or uGAS and fell into  
232 known associated regions (see **Supplementary Note 2**). Of these 11 loci, ten and nine loci could  
233 be identified by BN-cGAS and uGAS, respectively. Compared to uGAS, BN-cGAS identified one  
234 fewer locus (*ETFDH*), but identified two more (*ACSL1* for PC ae C42:5 and *PKD2LI* for lyso-  
235 PC a C16:1). It is interesting to note that for *ACSL1*, the effect of SNP rs4862429 on PC ae C42:5  
236 was highly significant ( $p=7e-11$ ) with BN-cGAS, but was not significant ( $p=0.7$ ) with uGAS; this  
237 outcome is to be expected under the model of unexpected pleiotropy.

238 Next, to test whether using BN-cGAS increases the average power of the association  
239 analysis, we compared the BN-cGAS and uGAS chi-square test results for the loci listed in **Table**  
240 **1**. Within a given locus, we compared the maximum test value. The **average** ratio of the maximum  
241 test statistic between BN-cGAS and uGAS was **1.33, indicating that on average, BN-cGAS led to**  
242 **higher test statistic values. However, when we used a paired-sample Wilcoxon test to compare the**  
243 **best chi-square test results between BN-cGAS and uGAS, the difference between the two methods**  
244 **was not significant ( $p=0.17$ ) (see **Supplementary Table S1A**).**

245 For the SNPs listed in **Table 1**, we then used Eq. (2) to partition the log-ratio of the BN-  
246 cGAS and uGAS statistics values into “noise” and “pleiotropic” components. As shown in **Figure**

1, the regression slope of the second (i.e., “pleiotropic”) component is considerably higher than the slope of the noise component; in other words, the ratio is determined primarily by the pleiotropic term in Eq. (2). Moreover, with the exception of the *SLC22A4* locus, the SNP-trait pairs for which BN-cGAS had increased power are the pairs in which the second term in Eq. (2) is either positive or close to zero. In contrast, in the SNP-trait pairs that were not identified using BN-cGAS, the “pleiotropic” term in Eq. (2) had a strong negative contribution.

Next, we investigated the variance-covariance structure of the loci with positive and negative pleiotropic terms. We therefore selected a locus in which the pleiotropic component’s contribution to power was positive (rs174547 at *FADS1*) and a locus in which the pleiotropic component’s contribution to power was negative (rs8396 at *ETFDH*). **Figure 2** shows the corresponding correlations between the SNP, the trait, and the covariates involved, together with the partial coefficients for the conditional regression of the trait on the SNP and the covariates. With respect to *FADS1* (**Figure 2A**), the correlations between the SNP and the trait (lyso-PC a C20:4) and between the SNP and the covariate (lyso-PC a C20:3) are in opposite directions, generating negative genetically induced covariance between lyso-PC a C20:4 and lyso-PC a C20:3. In contrast, the residual correlation between the trait and the covariate is positive. Therefore, the value of the **partial regression coefficient** between the SNP and lyso-PC a C20:4, conditional on lyso-PC a C20:3, is greater than that of the coefficient of regression without covariates.

With respect to the second example, *ETFDH* (**Figure 2B**), we found that the conditional regression of C10 on rs8396 and two covariates (C8 and C12, two medium-chain acylcarnitines) led to a smaller SNP **partial regression coefficient** compared to an unconditional regression; this is because all of the terms in  $\sum_{i=1}^k \hat{\beta}_i \hat{\rho}_{gi} / \hat{\rho}_{yg}$  are positive.

Decomposition plot

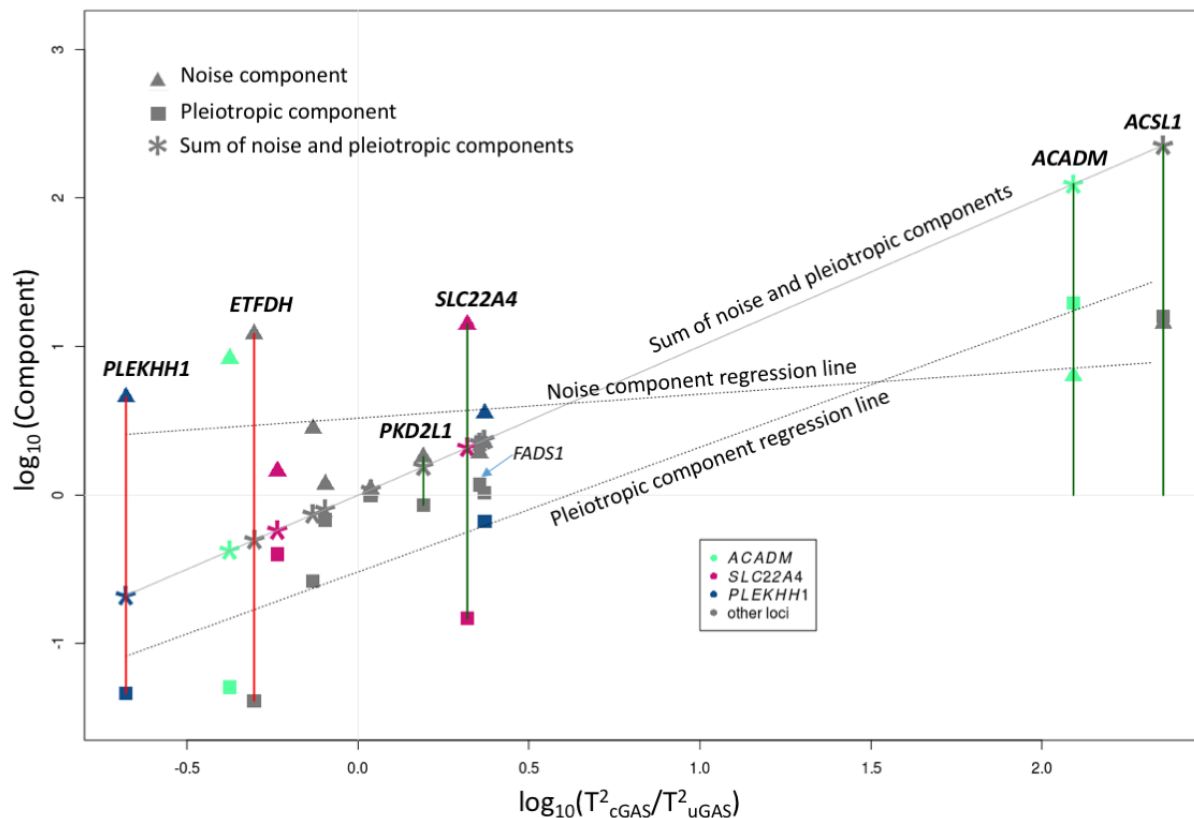

271  
 272 **Figure 1. Decomposition of the  $\log$ - $T^2$  ratio for cGAS and uGAS into pleiotropic and noise**  
 273 **components.** Vertically grouped trios (each composed of a square, triangle, and asterisk)  
 274 correspond to one of fourteen associations in Table 1. The position of a trio on the  $x$ -axis  
 275 corresponds to the log-ratio between conditional and univariate test statistic. On the  $y$ -axis,  
 276 the asterisk corresponds to the log-ratio of cGAS and uGAS  $T^2$  statistics. The value of the pleiotropic  
 277 component is depicted by a square, and the value of the noise component is depicted by a triangle.  
 278 Each trio is shown in gray, except the trios representing the ACADM, SLC22A4, and PLEKHH1  
 279 loci, for which we have two different associations. The three dotted lines correspond to the  
 280 regression lines for the two components and their sum. The four dark-green vertical lines indicate  
 281 the associations that were significant in the cGAS analysis but not in the uGAS analysis, and the  
 282 two dark-red lines indicates the associations that were significant only in the uGAS analysis.

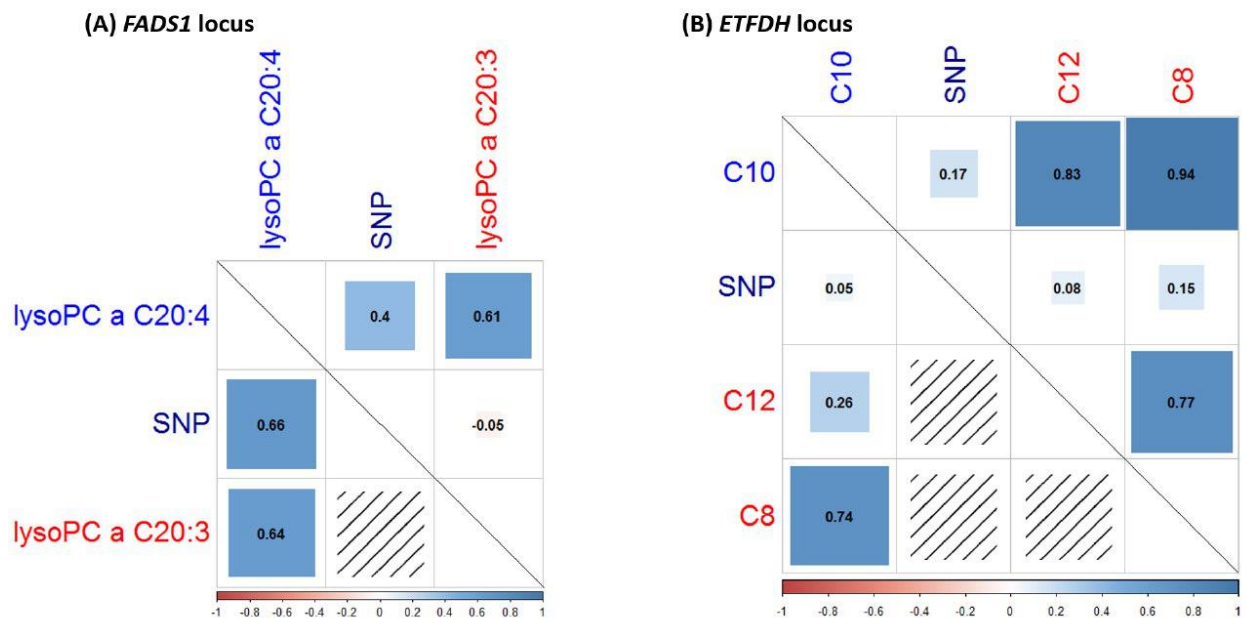

**Figure 2.** Matrix of correlations (above diagonal line) and the **partial regression coefficients** of the trait of interest on the SNP genotype and covariate(s) (the first column) for the *FADS1* (A) and *ETFDH* (B) loci. The **result of the univariate analysis of regression of the corresponding traits onto SNPs is presented in Supplementary Table S1B**. Names of traits used as covariates are in red. The number in a cell indicates the value of correlation (partial regression coefficient). The area of a square is proportional to the absolute value of correlation (partial regression coefficient); the effect magnitude is also reflected by square's color (the scale provided at the bottom of the graph). The *FADS1* locus represents scenario in which the pleiotropic term in Eq. (2) is strongly positive, while for *ETFDH* this term is negative.

Although using a known biochemical network to select covariates has many advantages, it may be somewhat unpractical and perhaps even harmful, as our biochemical knowledge is still relatively incomplete. Therefore, we explored the potential of performing a cGAS in which the covariates are selected using a data-driven approach (GGM-cGAS). The network of metabolites was reconstructed using Gaussian Graphical Models based on partial correlations. For a given metabolite, we selected covariates based on significant partial correlations. Specifically, we used the following threshold as proposed previously [18]: a  $p$ -value  $\leq$  (0.01/number of calculated partial correlations), which corresponds to a cut-off at  $p \leq 8.83 \times 10^{-7}$ . The network used in our analysis is shown in **Supplementary Figure S1**.

To compare GGM-cGAS with BN-cGAS, we used the same set of metabolites that we used for BN-cGAS to run our GGM-cGAS analysis; these results are presented in **Supplementary Table S1B**. We found 16 SNP-trait pairs clustered at 11 loci that were detected by either GGM-cGAS or BN-cGAS. More covariates were included in the GGM-cGAS analysis (ranging from 1 to 18, with mean and median values of 7.6 covariates and 7 covariates, respectively) than in the BN-cGAS analysis. Thus, we predicted that GGM-cGAS would have relatively more power than

310 BN-cGAS due to reduced noise (term 1 in Eq. (2)); on the other hand, GGM-cGAS might lose  
311 power because of reduced occurrence of unexpected pleiotropy (term 2 in Eq. (2)).

312 For the best SNP-trait pairs detected by GGM-cGAS or BN-cGAS, we computed the  
313 components in Eq. (2) and compared these components using a paired-sample Wilcoxon test. We  
314 found that the noise component in Eq. (2) was always larger for GGM-cGAS, with a mean  
315 difference of 0.24 ( $p=5 \times 10^{-4}$ ). Moreover, the second “pleiotropic” component in Eq. (2) was  
316 generally smaller for GGM-cGAS than for BN-cGAS, with a mean difference of -0.35 ( $p=0.018$ );  
317 nevertheless, for two out of 16 GGM-cGAS SNP-trait pairs, the pleiotropic component was  
318 positive. The average chi-square value was 33% smaller for GGM-cGAS than for BN-cGAS,  
319 indicating an average loss of power (although this loss was not significant;  $p=0.5$  based on a paired  
320 Wilcoxon test).

321 Next, we investigated further the potential of using cGAS under realistic conditions to a  
322 full extent by analyzing all 151 available metabolites using GGM-cGAS and comparing these  
323 results with the results of uGAS (Table 2 and Supplementary Figure S2). In total, uGAS detected  
324 15 loci at the genome-wide significance level  $p \leq 5 \times 10^{-8}/151$  (i.e.,  $p < 3.3 \times 10^{-10}$ ). On the other  
325 hand, GGM-cGAS identified 19 significant loci using the same threshold. As expected, the  
326 standard errors of the genetic effect estimates were smaller for GGM-cGAS than for uGAS (Table  
327 2 and Supplementary Figure S3). A total of 14 loci were detected by both uGAS and GGM-  
328 cGAS. GGM-cGAS failed to identify one locus that was identified by uGAS (C5:1-DC at  
329 rs2943644), but identified five loci that were missed by uGAS. Three of the five loci identified  
330 solely by GGM-cGAS affect amino acids, and the remaining two loci affect acylcarnitines. It is  
331 important to note that the loci identified by BN-cGAS (when we analyzed 105 metabolites) are a  
332 subset of the 19 loci that were identified by GGM-cGAS (when we used all 151 metabolites).

333 Finally, we searched the available literature for the loci listed in Table 2 (see  
334 Supplementary Note 2 for details). From the 20 loci that we report here, 15 were found to be  
335 significant at the genome-wide level in a recent large ( $n=7478$ ) meta-analysis of Biocrates  
336 metabolomics data reported by Draisma et al. [7]. Some of the metabolites analyzed in our study  
337 were not analyzed by Draisma et al. [7]; nevertheless, for 11 out of these 15 loci, we observed a  
338 significant association for the same SNP-metabolite pair; for three loci, the strongest association  
339 was with a metabolite in the same class, and for one locus the strongest association was with a  
340 metabolite from a different lipid class (see Supplementary Table S2). For the other five loci that  
341 were not significant in the study by Draisma et al. [7], we determined whether these five loci were  
342 significant and replicated in a study by Tsepilov et al. [19]. It should be noted that Tsepilov et al.  
343 analyzed the ratios of metabolites and also used the KORA F4 data set in their discovery stage,  
344 although they used another cohort (TwinsUK) for replication. Of these five loci, two were also

1  
2  
3  
4  
5  
6  
7  
8  
9  
10  
11  
12  
13  
14  
15  
16  
17  
18  
19  
20  
21  
22  
23  
24  
25  
26  
27  
28  
29  
30  
31  
32  
33  
34  
35  
36  
37  
38  
39  
40  
41  
42  
43  
44  
45  
46  
47  
48  
49  
50  
51  
52  
53  
54  
55  
56  
57  
58  
59  
60  
61  
62  
63  
64  
65

345 significant in the study by Tsepilov et al. [19]; moreover, for both of these loci the metabolite  
346 analyzed in our study was included in the ratios analyzed by Tsepilov et al. One of the five loci  
347 was associated with the same trait in two other studies [20,21]. Finally, we found no prior  
348 published evidence of any association with metabolites for rs2943644 (*LOC646736*) or  
349 rs17112944 (*LOC728755*). Taking into account that this association was not found in (much)  
350 bigger meta-analysis, we conclude the observed associations with rs17112944 and rs2943644 as  
351 likely false positives, and these two loci were excluded from further consideration.

16  
17  
18  
19  
20  
21  
22  
23  
24  
25  
26  
27  
28  
29  
30  
31  
32  
33  
34  
35  
36  
37  
38  
39  
40  
41  
42  
43  
44  
45  
46  
47  
48  
49  
50  
51  
52  
53  
54  
55  
56  
57  
58  
59  
60  
61  
62  
63  
64  
65

**Table 1. Eleven loci identified by BN-cGAS and uGAS on metabolites for which at least one one-reaction-step neighbor was available.**

| Locus                  | SNP        | Metabolite      | chr:pos      | Gene    | effA/refA | EAF  | uGAS         |           | cGAS         |           | N <sub>cov</sub> | Noise/Pleiotropic |
|------------------------|------------|-----------------|--------------|---------|-----------|------|--------------|-----------|--------------|-----------|------------------|-------------------|
|                        |            |                 |              |         |           |      | beta (se)    | P-value   | Beta (se)    | P-value   |                  |                   |
| <i>uGAS &amp; cGAS</i> |            |                 |              |         |           |      |              |           |              |           |                  |                   |
| 1                      | rs211718   | C8              | 1:75879263   | ACADM   | T/C       | 0.3  | -0.45(0.034) | 6.35E-39  | -0.10(0.012) | 4.45E-17  | 1                | 0.92/-1.29        |
| 1                      | rs211718   | C12             | 1:75879263   | ACADM   | T/C       | 0.3  | -0.04(0.036) | 2.21E-01  | 0.20(0.014)  | 4.07E-42  | 3                | 0.80/1.29         |
| 2                      | rs7705189  | PC ae C42:5     | 5:131651257  | SLC22A4 | G/A       | 0.47 | 0.15(0.034)  | 8.83E-06  | 0.06(0.009)  | 9.63E-11  | 3                | 1.16/-0.83        |
| 2                      | rs419291   | C5              | 5:131661254  | SLC22A4 | T/C       | 0.38 | 0.26(0.035)  | 6.62E-14  | 0.17(0.029)  | 1.40E-08  | 1                | 0.16/-0.40        |
| 3                      | rs9368564  | PC aa C42:5     | 6:11168269   | ELOVL2  | G/A       | 0.25 | -0.29(0.039) | 4.64E-14  | -0.15(0.024) | 1.06E-10  | 3                | 0.45/-0.58        |
| 4                      | rs12356193 | C0              | 10:61083359  | SLC16A9 | G/A       | 0.17 | -0.51(0.046) | 4.93E-28  | -0.42(0.042) | 8.83E-23  | 1                | 0.07/-0.17        |
| 5                      | rs174547   | lyso-PC a C20:4 | 11:61327359  | FADS1   | C/T       | 0.7  | 0.61(0.033)  | 2.12E-75  | 0.66(0.024)  | 2.65E-169 | 1                | 0.29/0.07         |
| 6                      | rs2066938  | C4              | 12:119644998 | ACADS   | G/A       | 0.27 | 0.73(0.033)  | 1.07E-104 | 0.72(0.031)  | 4.26E-116 | 1                | 0.05/0.00         |
| 7                      | rs10873201 | PC ae C36:5     | 14:67036352  | PLEKHH1 | T/C       | 0.45 | -0.26(0.034) | 6.34E-14  | -0.21(0.018) | 5.72E-31  | 2                | 0.55/-0.18        |
| 7                      | rs1077989  | PC ae C32:2     | 14:67045575  | PLEKHH1 | C/A       | 0.46 | -0.30(0.034) | 9.22E-19  | -0.06(0.016) | 5.39E-05  | 3                | 0.66/-1.34        |
| 8                      | rs4814176  | PC ae C40:2     | 20:12907398  | SPTLC3  | T/C       | 0.36 | 0.24(0.035)  | 5.60E-12  | 0.25(0.023)  | 1.28E-25  | 4                | 0.35/0.02         |
| <i>Only uGAS</i>       |            |                 |              |         |           |      |              |           |              |           |                  |                   |
| 9                      | rs8396     | C10             | 4:159850267  | ETFDH   | C/T       | 0.71 | 0.26(0.037)  | 1.32E-12  | 0.05(0.010)  | 5.08E-07  | 2                | 1.09/-1.39        |
| <i>Only cGAS</i>       |            |                 |              |         |           |      |              |           |              |           |                  |                   |
| 10                     | rs4862429  | PC ae C42:5     | 4:186006834  | ACSL1   | T/C       | 0.31 | 0.02(0.037)  | 6.63E-01  | -0.06(0.010) | 7.01E-11  | 3                | 1.15/1.20         |
| 11                     | rs603424   | Lyso-PC a C16:1 | 10:102065469 | PKD2LI  | A/G       | 0.8  | 0.23(0.042)  | 4.83E-08  | 0.21(0.031)  | 1.76E-11  | 1                | 0.26/-0.07        |

Notes: The best SNP-metabolite pair is shown for each locus. chr:pos refers to the physical position of the SNP; EAF, effect allele frequency; beta (se), the estimated effect and standard error of the SNP; effA/refA, effect allele/reference allele; P-value, the p-value of the additive model; Gene, the most likely (according to DEPICT) associated gene in the region; N<sub>cov</sub>, the number of covariates used in cGAS; **Noise/Pleiotropic**, the values of noise and pleiotropic components of the log-ratio of cGAS and uGAS T<sup>2</sup> statistics.

16  
17  
18  
19  
20  
21  
22  
23  
24  
25  
26  
27  
28  
29  
30  
31  
32  
33  
34  
35  
36  
37  
38  
39  
40  
41  
42  
43  
44  
45  
46  
47  
48  
49  
50  
51  
52  
53  
54  
55  
56  
57  
58  
59  
60  
61  
62  
63  
64  
65

**Table 2. Twenty loci identified by GGM-cGAS and uGAS.**

| LOCUS                  | SNP        | Metabolite      | chr:pos      | Gene      | effA/refA | EAF  | uGAS         |           |              | cGAS      |                  |            | Noise/Pleiotropic |
|------------------------|------------|-----------------|--------------|-----------|-----------|------|--------------|-----------|--------------|-----------|------------------|------------|-------------------|
|                        |            |                 |              |           |           |      | beta (se)    | P-value   | beta (se)    | P-value   | N <sub>cov</sub> |            |                   |
| <i>uGAS &amp; cGAS</i> |            |                 |              |           |           |      |              |           |              |           |                  |            |                   |
| 1                      | rs211718   | C6 (C4:1-DC)    | 1:75879263   | ACADM     | T/C       | 0.30 | -0.48(0.034) | 3.31E-44  | -0.13(0.017) | 1.21E-13  | 7                | 0.61/-1.16 |                   |
| 1                      | rs7552404  | C6 (C4:1-DC)    | 1:75908534   | ACADM     | G/A       | 0.30 | -0.48(0.034) | 2.14E-44  | -0.12(0.017) | 2.34E-13  | 7                | 0.61/-1.17 |                   |
| 2                      | rs483180   | Ser             | 1:120069028  | PHGDH     | G/C       | 0.30 | -0.24(0.037) | 2.26E-11  | -0.24(0.028) | 1.10E-17  | 2                | 0.24/-0.02 |                   |
| 2                      | rs477992   | Ser             | 1:120059099  | PHGDH     | A/G       | 0.70 | 0.24(0.037)  | 3.50E-11  | 0.24(0.028)  | 2.52E-18  | 2                | 0.24/0.00  |                   |
| 3                      | rs2286963  | C9              | 2:210768295  | ACADL     | G/T       | 0.63 | -0.49(0.032) | 4.76E-52  | -0.48(0.027) | 7.41E-73  | 3                | 0.16/-0.01 |                   |
| 4                      | rs8396     | C10             | 4:159850267  | ETFDH     | C/T       | 0.71 | 0.26(0.037)  | 1.32E-12  | 0.04(0.010)  | 1.23E-05  | 8                | 1.11/-1.53 |                   |
| 4                      | rs8396     | C7-DC           | 4:159850267  | ETFDH     | C/T       | 0.71 | -0.09(0.037) | 1.67E-02  | -0.13(0.019) | 2.93E-11  | 8                | 0.56/0.33  |                   |
| 5                      | rs419291   | C5              | 5:131661254  | SLC22A4   | T/C       | 0.38 | 0.26(0.035)  | 6.62E-14  | 0.17(0.026)  | 2.25E-10  | 3                | 0.25/-0.40 |                   |
| 5                      | rs270613   | C5              | 5:131668482  | SLC22A4   | A/G       | 0.61 | -0.26(0.035) | 7.48E-14  | -0.17(0.026) | 8.24E-11  | 3                | 0.25/-0.38 |                   |
| 6                      | rs9393903  | PC aa C42:5     | 6:11150895   | ELOVL2    | A/G       | 0.75 | 0.29(0.039)  | 9.13E-14  | 0.18(0.020)  | 1.32E-19  | 6                | 0.56/-0.38 |                   |
| 6                      | rs9368564  | PC aa C42:5     | 6:11168269   | ELOVL2    | G/A       | 0.25 | -0.29(0.039) | 4.64E-14  | -0.19(0.021) | 3.04E-19  | 6                | 0.56/-0.40 |                   |
| 7                      | rs816411   | Ser             | 7:56138983   | PHKG1     | C/T       | 0.51 | -0.22(0.034) | 1.53E-10  | -0.19(0.026) | 4.83E-13  | 2                | 0.23/-0.12 |                   |
| 7                      | rs1894832  | Ser             | 7:56144740   | PHKG1     | C/T       | 0.51 | 0.21(0.034)  | 2.33E-10  | 0.19(0.026)  | 1.55E-13  | 2                | 0.23/-0.09 |                   |
| 8                      | rs12356193 | C0              | 10:61083359  | SLC16A9   | G/A       | 0.17 | -0.51(0.046) | 4.93E-28  | -0.27(0.034) | 1.03E-15  | 3                | 0.26/-0.53 |                   |
| 9                      | rs174547   | lyso-PC a C20:4 | 11:61327359  | FADS1     | C/T       | 0.70 | 0.61(0.033)  | 2.12E-75  | 0.07(0.011)  | 2.08E-10  | 9                | 0.98/-1.90 |                   |
| 9                      | rs174556   | PC ae C44:4     | 11:61337211  | FADS1     | T/C       | 0.27 | 0.09(0.038)  | 1.61E-02  | 0.21(0.014)  | 1.17E-48  | 3                | 0.84/0.73  |                   |
| 10                     | rs2066938  | C4              | 12:119644998 | ACADS     | G/A       | 0.27 | 0.73(0.033)  | 1.07E-104 | 0.71(0.024)  | 6.95E-189 | 2                | 0.28/-0.02 |                   |
| 11                     | rs12879147 | PC aa C28:1     | 14:63297349  | SYNE2     | A/G       | 0.85 | -0.46(0.050) | 1.83E-19  | -0.12(0.019) | 6.87E-11  | 14               | 0.86/-1.14 |                   |
| 11                     | rs17101394 | SM(OH) C14:1    | 14:63302139  | SYNE2     | A/G       | 0.83 | -0.32(0.050) | 1.02E-10  | -0.10(0.011) | 9.23E-18  | 7                | 1.30/-1.05 |                   |
| 12                     | rs1077989  | PC ae C36:5     | 14:67045575  | PLEKHH1   | C/A       | 0.46 | -0.26(0.034) | 4.96E-14  | -0.08(0.010) | 2.56E-15  | 10               | 1.05/-1.00 |                   |
| 12                     | rs1077989  | PC ae C32.2     | 14:67045575  | PLEKHH1   | C/A       | 0.46 | -0.30(0.034) | 9.22E-19  | -0.05(0.016) | 1.35E-03  | 6                | 0.67/-1.55 |                   |
| 13                     | rs4814176  | SM(OH).C22:1    | 20:12907398  | SPTLC3    | T/C       | 0.36 | 0.03(0.035)  | 4.53E-01  | -0.07(0.009) | 9.11E-17  | 10               | 1.22/0.87  |                   |
| 13                     | rs4814176  | SM(OH) C24:1    | 20:12907398  | SPTLC3    | T/C       | 0.36 | 0.24(0.035)  | 4.29E-12  | 0.09(0.013)  | 2.85E-11  | 9                | 0.86/-0.90 |                   |
| 14                     | rs5746636  | Pro             | 22:17276301  | PRODH     | T/G       | 0.24 | -0.31(0.039) | 1.89E-15  | -0.32(0.034) | 5.05E-21  | 2                | 0.11/0.03  |                   |
| <i>Only uGAS</i>       |            |                 |              |           |           |      |              |           |              |           |                  |            |                   |
| 15                     | rs2943644  | C5:1-DC         | 2:226754586  | LOC646736 | C/T       | 0.68 | 0.32(0.042)  | 3.99E-14  | 0.09(0.022)  | 3.97E-05  | 5                | 0.56/-1.08 |                   |



16  
17  
18  
19  
20  
21  
22  
23  
24  
25  
26  
27  
28  
29  
30  
31  
32  
33  
34  
35  
36  
37  
38  
39  
40  
41  
42  
43  
44  
45  
46  
47  
48  
49  
50  
51  
52  
53  
54  
55  
56  
57  
58  
59  
60  
61  
62  
63  
64  
65

| Only cGAS |            |             |              |           |     |      |              |          |              |          |   |            |
|-----------|------------|-------------|--------------|-----------|-----|------|--------------|----------|--------------|----------|---|------------|
| 16        | rs1374804  | Gly         | 3:127391188  | ALDH1L1   | A/G | 0.64 | 0.20(0.036)  | 1.46E-08 | 0.21(0.029)  | 3.65E-13 | 3 | 0.17/0.05  |
| 17        | rs4862429  | PC ae C42:5 | 4:186006834  | ACSL1     | T/C | 0.31 | 0.02(0.037)  | 6.63E-01 | -0.06(0.008) | 1.15E-12 | 8 | 1.34/1.09  |
| 18        | rs603424   | C16:1       | 10:102065469 | PKD2L1    | A/G | 0.80 | 0.16(0.042)  | 9.00E-05 | 0.14(0.018)  | 9.32E-14 | 9 | 0.71/-0.15 |
| 19        | rs2657879  | Gln         | 12:55151605  | GLS2      | G/A | 0.21 | -0.24(0.042) | 2.65E-08 | -0.27(0.030) | 5.88E-18 | 5 | 0.29/0.10  |
| 20        | rs17112944 | C6:1        | 14:27179297  | LOC728755 | A/G | 0.90 | -0.28(0.059) | 1.98E-06 | -0.21(0.031) | 3.74E-11 | 9 | 0.54/-0.26 |

Notes: The best SNP-metabolite pair is shown for each locus. chr:pos refers to the physical position of the SNP; EAF, effect allele frequency; beta (se), the estimated effect and standard error of the SNP; effA/refA, effect allele/reference allele; *P*-value, the *p*-value of the additive model; Gene, the most likely (according to DEPICT) associated gene in the region; N<sub>cov</sub>, the number of covariates used in cGAS; **Noise/Pleiotropic, the values of noise and pleiotropic components of the log-ratio of cGAS and uGAS T<sup>2</sup> statistics.**

1 364 **Discussion**

2  
3  
4 365 We report a new “trait-centric” approach for analyzing genetic determinants of multivariate  
5 366 “omics” traits by performing a network-based conditional genetic association analysis (cGAS). In  
6  
7 367 the context of metabolomics, for each trait we selected a set of other metabolites to be used as  
8  
9 368 covariates in our genetic association analysis. The selection of covariates can be either mechanistic  
10  
11 369 (e.g., based on known biological relationships between traits of interest) or data-driven (e.g., based  
12  
13 370 on partial correlations). Importantly, this approach can use either individual-level or summary-  
14  
15 371 level data. We first mathematically compared the power of conditional and standard single-trait  
16  
17 372 genetic association analyses (univariate genetic association, uGAS), and we identified scenarios  
18  
19 373 in which these analyses are expected to produce different results; next, we applied cGAS to 151  
20  
21 374 metabolomics traits (Biocrates panel) in a large (n=1784 individuals) population-based KORA  
22  
23 375 cohort.

24 376 We found that the log-ratio between the cGAS and uGAS test statistic can be decomposed  
25  
26 377 in a “noise” component (which depends on residual variance of the trait and is always positive)  
27  
28 378 and a “pleiotropic” component. The pleiotropic component is negative in cases in which  
29  
30 379 genetically induced covariance (between the trait of interest and the trait used as the covariate) and  
31  
32 380 the residual covariance have the same sign (i.e., act in the same direction). The pleiotropic  
33  
34 381 component is positive in cases in which the genetically induced covariance and residual covariance  
35  
36 382 act in opposite directions.

37 383 Should one expect that genetically induced and residual covariance act in the same or  
38  
39 384 opposite directions? In essence, this is a question about the architecture of pleiotropy: is a  
40  
41 385 pleiotropic genetic variant expected to induce the same covariance as would be induced by non-  
42  
43 386 genetic mechanisms? It has been reasoned that in randomly bred populations, the genetic  
44  
45 387 correlations are expected to arise primarily from pleiotropic gene action [22]. In such populations,  
46  
47 388 a study and comparison of genetic and environmental correlations—while unable to provide  
48  
49 389 single-variant resolution—may provide a general notion of what may be expected for  
50  
51 390 consistency/anti-consistency between genetic and residual covariance. Based on published  
52  
53 391 literature, Cheverud [23] and Roff [24] concluded that genetic and environmental correlations  
54  
55 392 normally have both the same sign and the same magnitude. This pattern is particularly clear for  
56  
57 393 morphologic traits, as opposed to life-history traits (see [25] for review and additional references).  
58  
59 394 These observations are consistent with recent studies of genetic correlations between complex  
60  
61 395 human polygenic traits (see [26]).

396           Consequently, for complex traits, one may expect that the sign of the pleiotropic  
397 component of the log-ratio between the cGAS and uGAS tests (individual summands in the second  
398 term of the equation (2)) is generally negative. It should be noted, though, that a negative sign for  
399 the pleiotropic component does not necessarily indicate higher power of the uGAS, as the noise  
400 component (the first term in equation (2)) may still dominate the log-ratio between the cGAS and  
401 uGAS tests. This will happen, for example, when  $\hat{\rho}_{cg}$  (the effect of the genotype on the covariate)  
402 is small while  $\hat{\beta}_{yc}$  (partial residual regression between the trait and covariate) is relatively large,  
403 thereby reducing  $\hat{\sigma}_c^2$ .

404           Nevertheless, in the case of metabolomic traits, genetic and environmental sources do not  
405 necessarily generate consistent covariance. Moreover, for a given locus that affects the activity of  
406 an enzyme involved in a biochemical reaction, the unexpected inconsistency between genetically  
407 induced covariance and residual covariance may not be so unexpected after all. Indeed, consider  
408 an allele associated with an increased activity of an enzyme that converts substrate A into product  
409 B. One would expect that the levels of A and B are positively correlated; one would also expect  
410 that the allele is positively correlated with the level of product B and negatively correlated with  
411 the level of substrate A. This is precisely the scenario that yields a positive value for the second  
412 term in Eq. (1), thus providing an additional increase in power above and beyond the power  
413 provided by the first term in Eq. (1) (noise reduction).

414           Our empirical investigation of real data on the genetic association between the genome and  
415 metabolites confirmed the existence of both scenarios. An extreme example of concordance  
416 between genetic covariance and residual covariance is provided by the effects of rs8396 on C10,  
417 with C8 and C12 used as covariates (see Figure 2B). The *ETFDH* gene, which was prioritized by  
418 DEPICT software (see Materials and Methods) as the best candidate in this region (with a false-  
419 discover rate <5%), encodes the enzyme electron transfer flavoprotein (ETF) dehydrogenase,  
420 which plays a role in mitochondrial fatty acid oxidation. During this process, the acyl group is  
421 transferred from a long chain acylcarnitine to a long-chain acetyl-CoA, which is then catabolized.  
422 ETF dehydrogenase participates in the catabolic process by transferring electrons from acyl-CoA  
423 dehydrogenase to the oxidative phosphorylation pathway. Thus, the *ETFDH* gene should affect all  
424 forms of long-chain acylcarnitines in the same way, and we can expect that the pleiotropic effect  
425 of this gene on the acylcarnitines in our example (C8, C10, C12, etc.) will be unidirectional. The  
426 presence of unidirectional genetic effects and the positive correlation between these acylcarnitines  
427 makes the second term in Eq. (2) negative, which determines that—in this situation—univariate  
428 GAS has more power than cGAS.

429           An empirical example of discordance between genetically induced covariance and residual  
430 covariance is provided by the effects of the SNP rs174547 on lyso-PC a C20:4, with lyso-PC a

431 C20:3 used as a covariate. This SNP exhibits opposite correlations with lyso-PC a C20:4 and lyso-  
432 PC a C20:3, resulting in negative genetically induced covariance between these traits. At the same  
433 time, the residual correlation between these traits is positive, resulting in steep increase in the  
434 power of conditional analysis. In this region, the *FADS1/2/3* gene cluster is an attractive candidate,  
435 providing the detected model with biological relevance. The *FADS1* gene encodes the enzyme  
436 fatty acid desaturase 1, whereas the two traits differ by only one double bond. Thus, this example  
437 mimics perfectly the biochemical scenario in which we would expect a conditional analysis to  
438 have increased power.

439 The trait-centric methods considered here provide an attractive framework to identify and  
440 study direct genetic effects on a trait of interest. Conditional analysis is an attractive option in cases  
441 in which we wish to clearly interpret the results in terms of the effect of the genotype on a particular  
442 trait. Such specific interpretation may be important when comparing genetic association results  
443 obtained for our trait of interest with results obtained for other traits (e.g., using the methods  
444 described in [27–29]). It should be noted, though, that a trait-centric approach is not intended to  
445 maximize the power of identifying genes that affect metabolomics as a whole. Such a gene-centric  
446 view would favor analysis using joint—and not conditional—modeling of sets of traits. Such an  
447 approach can maintain power across a wide range of scenarios, including the scenario of  
448 concordance between genetically induced and residual covariance [13]. In this gene-centric  
449 framework, other formulations of conditional analysis have also been proposed [30] in order to  
450 specifically increase power of gene identification by selecting covariates that—using our  
451 terminology—affect the “noise reduction” component of the model while avoiding the problems  
452 associated with the pleiotropic component.

453 The proper selection of sets of biologically related traits is extremely important for the  
454 conditional genetic association analysis method described here, as well as for multivariate methods  
455 that model the joint effects of genotype on an ensemble of traits. Here, we considered two  
456 alternative approaches—knowledge based and data-driven—to finding the networks of related  
457 traits, with a subnetwork centered around a trait of interest used as the analyzed set. In principle,  
458 in the context of analyzed metabolomics data, the knowledge-based network approach has slightly  
459 higher power in the context of trait-centric genetic association analysis. However, we believe that  
460 our analysis revealed that both approaches are suboptimal. The knowledge-based network  
461 reconstruction has many advantages, but it may be somewhat unpractical, as our biochemical  
462 knowledge is still relatively incomplete. Secondly, by reconstructing the network while relying  
463 only on current knowledge, we may be missing new knowledge that may be revealed by the data.  
464 Finally, by including neighbors that are based only on biochemical information, we may miss  
465 covariance induced by technical confounders; adjusting for this may increase the power of analysis

1  
2  
3  
4  
5  
6  
7  
8  
9  
10  
11  
12  
13  
14  
15  
16  
17  
18  
19  
20  
21  
22  
23  
24  
25  
26  
27  
28  
29  
30  
31  
32  
33  
34  
35  
36  
37  
38  
39  
40  
41  
42  
43  
44  
45  
46  
47  
48  
49  
50  
51  
52  
53  
54  
55  
56  
57  
58  
59  
60  
61  
62  
63  
64  
65

466 [30]. Learning the network from the same data that were used for genetic analysis has the  
467 disadvantages of potentially ignoring existing knowledge and being sensitive to sample size.  
468 Finally, we note that the total observed correlation between metabolites is determined by the  
469 balance between genetic and environmental sources of covariance; it is possible to imagine a  
470 situation in which total correlation is smaller than one or more of its components, and our analysis  
471 provides examples of such a situation. We may speculate that—ideally—one should use a method  
472 that allows one to combine prior knowledge and new information obtained from the data, thereby  
473 allowing the simultaneous learning of the structure of dependencies between different metabolites  
474 and between the metabolites and the genome. Such learning from the data while allowing for the  
475 incorporation of previous knowledge (e.g., biochemical relations between traits) might be achieved  
476 (for example, by applying a machine-learning approach that allows for differential shrinkage). It  
477 is also important to note that the proper application of such an approach would require the  
478 availability of vast samples of data, thereby allowing for separate training, validation, verification,  
479 testing, and replication of detected dependencies and associations.

## 480 **Materials and Methods**

### 481 **KORA study**

482 The KORA study (Cooperative Health Research in the region of Augsburg) is a series of  
483 population-based studies in the region of Augsburg in Southern Germany [31]. KORA F4 is a  
484 follow-up survey (conducted from 2006 through 2008) of the baseline KORA S4 survey, which  
485 was conducted from 1999 through 2001. All study protocols were approved by the ethics  
486 committee of the Bavarian Medical Chamber, and all participants provided written informed  
487 consent.

488 The concentration of 163 metabolites were measured in 3061 serum samples obtained from  
489 KORA F4 participants using flow injection electrospray ionization tandem mass spectrometry and  
490 the AbsoluteIDQ p150 Kit (Biocrates Life Sciences AG, Innsbruck, Austria) [32]. After applying  
491 quality control screening, a total of 151 metabolite measurements were used in our analysis.  
492 Details regarding the methods and quality control of the metabolite measurements, as well as  
493 details regarding the metabolite nomenclature, have been published previously [32]. The  
494 nomenclature for the metabolites in this study is provided in **Supplementary Table S3**.

495 Genotyping was performed using the Affymetrix 6.0 SNP array (534,174 SNP markers  
496 after quality control), with further imputation using HapMap2 (release 22) as a reference panel,  
497 resulting in a total of 1,717,498 SNPs (for details, see ref. [33]). Both the metabolite concentrations  
498 and genotype were available for 1785 participants in the KORA F4 study.

### 500 **Statistical analysis**

501 Partial correlation coefficients and their  $p$ -values were calculated using the “ppcor” package [34]  
502 in R. Graphical representations were generated using the “ggm” [35] package in R. Consistent  
503 with previous studies [18], we considered a **partial regression coefficient** to be significant at  $p$   
504  $< 0.01/(151*150/2)$  (i.e.,  $p < 8.83 \times 10^{-7}$ ).

505 For the GWAS analysis, we used OmicABEL software [36]. Prior to GWAS, all traits were  
506 first adjusted for the participant’s sex, age, and batch effect; subsequently, the residual traits were  
507 transformed using an inverse-normal transformation [37]. The genotypes from the KORA F4  
508 cohort were used. Only SNPs that had a call rate  $\geq 0.95$ ,  $R^2 \geq 0.3$ , Hardy–Weinberg equilibrium  
509 (HWE)  $p \geq 10^{-6}$ , and MAF  $\geq 0.1$  (1,717,498 SNPs in total) were included in the analysis. The  
510 genomic control method was used to correct for any possible inflation of the test statistics. The  
511 genomic control [38] lambda value for all traits was between 1.00 and 1.03.

512 In a specific analysis (i.e., cGAS or uGAS), we defined independent loci as groups of  
513 genome-wide significant associations that were separated by at least 500 kb or were located on

514 different chromosomes. The strongest association (i.e., the association with the lowest  $p$ -value)  
515 was selected to represent this locus. The cGAS and uGAS results were considered to reflect  
516 different loci if the strongest associations were in loci that were separated by at least 500 kb. The  
517 threshold for the genome-wide significance for 151 traits was set to  $p=5 \times 10^{-8}/151$  (i.e.,  
518  $p=3.31 \times 10^{-10}$ ).

519 When partitioning the log(cGAS/uGAS) test statistics into the noise and pleiotropic  
520 components (see Eq. (2) and **Figure 1**), we used all known loci that were significant in either the  
521 cGAS or uGAS analysis (see Table 1). If a locus included two SNPs associated with different  
522 traits, we included both associations during partitioning. If a locus included two SNPs associated  
523 with the same trait, to be conservative we included only the **SNP** with the lower uGAS  $p$ -value  
524 during partitioning. After partitioning, we **determined whether the value of the** pleiotropic and  
525 noise components **were statistically different** using the paired-samples Wilcoxon test. For  
526 comparing the chi-square test results for the two methods, for each locus we first selected the  
527 method that yielded the strongest association (and hence the largest chi-square value). We  
528 compared that chi-square value with the maximal chi-square value observed for the second method  
529 within a 500-kb region centered around the strongest association observed using the first method.

530 **The code for BN-cGAS and GGM-cGAS analyses, and the code for producing the**  
531 **summary tables and graphs, was implemented in R and is available as a workflow from**  
532 **CodeOcean, a cloud-based computational reproducibility platform.**

### 534 ***In silico* functional annotation**

535 We conducted functional annotation for our findings. **To prioritize genes in associated regions,**  
536 **gene set enrichment, and tissue/cell-type enrichment analyses, we used DEPICT (Data-driven**  
537 **Expression-Prioritized Integration for Complex Traits) software [39]** (release 140721) with the  
538 following settings: flag\_loci = 1; flag\_genes = 1; flag\_genesets = 1; flag\_tissues = 1; param\_ncores  
539 = 2; and further manual annotation (h37 assembly). All 27 SNPs (clustered in 20 loci) identified  
540 by cGAS or uGAS (see **Table 2**) were included in the analysis. If more than one gene was  
541 annotated for a SNP by DEPICT, we selected the gene with the lowest nominal DEPICT P-value.  
542 In most cases, the results of manual annotation matched the annotation results using DEPICT  
543 annotation (see **Supplementary Note 2**). In addition, we looked up each SNP using the  
544 Phenoscanner [40] database to check whether it was previously reported to be associated with  
545 metabolic traits at  $p < 5 \times 10^{-8}$  and proxy  $r^2 < 0.7$ .

546

547 **Additional Files**

1 548 Supplementary Note 1 – cGAS using summary level data  
2

3 549 Supplementary Note 2 – Literature search for loci identified by cGAS and uGAS  
4

5 550 Supplementary Tables  
6

7 551       Supplementary Table S1 – BN- cGAS and GGM- cGAS for 105 metabolites  
8

9 552       Supplementary Table S2 – GGM-cGAS and uGAS for 151 metabolites  
10

11 553       Supplementary Table S3 - List of metabolites measured using the AbsoluteIDQ p150 Kit  
12

13 554 Supplementary Figures  
14

15 555       Supplementary Figure S1 – Partial correlations network  
16

17 556       Supplementary Figure S2 – Manhattan plots for cGAS and uGAS for 151 metabolites  
18

19 557       Supplementary Figure S3 – Comparison of effect estimates and their standard errors for  
20

21 558 SNPs from Table 2  
22

23 559

24 560 **Abbreviations**

25  
26 561 GWAS – genome-wide association study  
27

28 562 cGAS – conditional GWAS  
29

30 563 uGAS – univariate GWAS (trait-by-trait)  
31

32 564 BN-cGAS – cGAS based on biochemical networks  
33

34 565 GGM-cGAS – Gaussian Graphical Modeling cGAS based on partial correlations network  
35

36 566

37 567 **Acknowledgments**

38  
39  
40 568 We thank Athina Spilopoulou and Felix Agakov for helpful discussions. We also thank Alexander  
41

42 569 Zlobin and Alexander Grishenko for help preparing the tables and figures in the manuscript, and  
43

44 570 we thank Sophie Molnos for help with data management.  
45

46 571

47 572 **Funding**

48  
49  
50 573 The KORA study was initiated and financed by the Helmholtz Center Munich – German  
51

52 574 Research Center for Environmental Health, which is funded by the German Federal Ministry of  
53

54 575 Education and Research (BMBF) and by the State of Bavaria. Furthermore, the KORA study  
55

56 576 was supported by the Munich Center of Health Sciences (MC-Health), Ludwig Maximilian  
57

58 577 University of Munich, as part of the LMUinnovativ project.  
59

60 578 This work was supported by the European Union FP7 framework project Pain-Omics (grant  
61

62 579 number 602736).  
63  
64  
65



1  
2  
3  
4  
5  
6  
7  
8  
9  
10  
11  
12  
13  
14  
15  
16  
17  
18  
19  
20  
21  
22  
23  
24  
25  
26  
27  
28  
29  
30  
31  
32  
33  
34  
35  
36  
37  
38  
39  
40  
41  
42  
43  
44  
45  
46  
47  
48  
49  
50  
51  
52  
53  
54  
55  
56  
57  
58  
59  
60  
61  
62  
63  
64  
65

580 SS was supported by the Russian Ministry of Science and Education under the 5-100 Excellence  
581 Programme. YA and YT were supported by the Federal Agency of Scientific Organisations via  
582 the Institute of Cytology and Genetics (project number 0324-2018-0017).

583

## 584 **Authors Contributions**

585 YT, CG, and YA designed and supervised the study; PC, CP, JA, KG, and RW-S collected the  
586 data; CG and KS contributed data for the analysis; YT, OZ, and SS analyzed the data; YT, YA,  
587 CG, OZ, JK, and KS discussed and interpreted the results; YT, OZ, CG, and YA wrote the  
588 manuscript. All authors contributed to and approve the final version of the manuscript.

589

## 590 **Availability of Data and Materials**

591 The code produced in relation to this work is distributed under the MIT license and is available  
592 from [https://codeocean.com/2018/04/02/a-network-based-conditional-genetic-association-](https://codeocean.com/2018/04/02/a-network-based-conditional-genetic-association-analysis-of-the-human-metabolome/)  
593 [analysis-of-the-human-metabolome/](https://codeocean.com/2018/04/02/a-network-based-conditional-genetic-association-analysis-of-the-human-metabolome/). All summary statistics and association data that are  
594 necessary to reproduce our results are licensed under CC0 and are accessible online at  
595 [https://codeocean.com/2018/04/02/a-network-based-conditional-genetic-association-analysis-of-](https://codeocean.com/2018/04/02/a-network-based-conditional-genetic-association-analysis-of-the-human-metabolome/)  
596 [the-human-metabolome/](https://codeocean.com/2018/04/02/a-network-based-conditional-genetic-association-analysis-of-the-human-metabolome/). The informed consent given by the KORA study participants does not  
597 cover the posting of participant-level phenotype or genotype data in public databases. However,  
598 the KORA data are available upon request from KORA-gen ([https://www.helmholtz-](https://www.helmholtz-muenchen.de/en/kora/index.html)  
599 [muenchen.de/en/kora/index.html](https://www.helmholtz-muenchen.de/en/kora/index.html)). Requests can be submitted online and are subject to approval  
600 by the KORA board.

601

## 602 **Competing Interests**

603 Y. Aulchenko is the founder and co-owner of PolyOmica, a private research organization that  
604 specializes in computational and statistical (gen)omics.

605

606 **References**

1 607 1. Visscher PM, Brown MA, McCarthy MI, Yang J. Five Years of GWAS Discovery. *Am J Hum*  
2 608 *Genet* [Internet]. 2012;90:7–24. Available from:  
3 609 <http://linkinghub.elsevier.com/retrieve/pii/S0002929711005337>  
4 610 2. Ritchie MD, Holzinger ER, Li R, Pendergrass SA, Kim D. Methods of integrating data to  
5 611 uncover genotype–phenotype interactions. *Nat Rev Genet* [Internet]. 2015;16:85–97. Available  
6 612 from: <http://www.nature.com/doifinder/10.1038/nrg3868>  
7 613 3. van der Sijde MR, Ng A, Fu J. Systems genetics: From GWAS to disease pathways. *Biochim*  
8 614 *Biophys Acta - Mol Basis Dis* [Internet]. 2014;1842:1903–9. Available from:  
9 615 <http://linkinghub.elsevier.com/retrieve/pii/S0925443914001124>  
10 616 4. Hicks AA, Pramstaller PP, Johansson A, Vitart V, Rudan I, Ugocsai P, et al. Genetic  
11 617 determinants of circulating sphingolipid concentrations in European populations. *PLoS Genet*  
12 618 [Internet]. 2009 [cited 2013 Dec 19];5:e1000672. Available from:  
13 619 <http://www.pubmedcentral.nih.gov/articlerender.fcgi?artid=2745562&tool=pmcentrez&renderty>  
14 620 [pe=abstract](http://www.pubmedcentral.nih.gov/articlerender.fcgi?artid=2745562&tool=pmcentrez&renderty)  
15 621 5. Suhre K, Shin S-Y, Petersen A-K, Mohny RP, Meredith D, Wägele B, et al. Human metabolic  
16 622 individuality in biomedical and pharmaceutical research. *Nature* [Internet]. 2011 [cited 2013 Dec  
17 623 19];477:54–60. Available from:  
18 624 <http://www.pubmedcentral.nih.gov/articlerender.fcgi?artid=3832838&tool=pmcentrez&renderty>  
19 625 [pe=abstract](http://www.pubmedcentral.nih.gov/articlerender.fcgi?artid=3832838&tool=pmcentrez&renderty)  
20 626 6. Inouye M, Ripatti S, Kettunen J, Lyytikäinen L-P, Oksala N, Laurila P-P, et al. Novel Loci for  
21 627 metabolic networks and multi-tissue expression studies reveal genes for atherosclerosis. Visscher  
22 628 PM, editor. *PLoS Genet* [Internet]. 2012;8:e1002907. Available from:  
23 629 <http://dx.plos.org/10.1371/journal.pgen.1002907>  
24 630 7. Draisma HHM, Pool R, Kobl M, Jansen R, Petersen A-K, Vaarhorst AAM, et al. Genome-wide  
25 631 association study identifies novel genetic variants contributing to variation in blood metabolite  
26 632 levels. *Nat Commun* [Internet]. England; 2015;6:7208. Available from:  
27 633 <http://www.ncbi.nlm.nih.gov/pubmed/26068415>  
28 634 8. Kettunen J, Demirkan A, Würtz P, Draisma HHMM, Haller T, Rawal R, et al. Genome-wide  
29 635 study for circulating metabolites identifies 62 loci and reveals novel systemic effects of LPA. *Nat*  
30 636 *Commun* [Internet]. 2016;7:11122. Available from:  
31 637 <http://www.ncbi.nlm.nih.gov/pubmed/27005778> <http://www.nature.com/doifinder/10.1038/ncomms11122>  
32 638 9. Cichonska A, Rousu J, Marttinen P, Kangas AJ, Soininen P, Lehtimäki T, et al. metaCCA:  
33 639 summary statistics-based multivariate meta-analysis of genome-wide association studies using  
34 640 canonical correlation analysis. *Bioinformatics* [Internet]. 2016;32:1981–9. Available from:  
35 641 <http://www.ncbi.nlm.nih.gov/pubmed/27153689>  
36 642 10. Stephens M. A unified framework for association analysis with multiple related phenotypes.  
37 643 *PLoS One* [Internet]. 2013;8:e65245. Available from:  
38 644 <http://www.ncbi.nlm.nih.gov/pubmed/23861737>  
39 645 11. O’Reilly PF, Hoggart CJ, Pomyen Y, Calboli FCF, Elliott P, Jarvelin M-R, et al. MultiPhen:  
40 646 joint model of multiple phenotypes can increase discovery in GWAS. *PLoS One* [Internet]. 2012  
41 647 [cited 2014 Sep 20];7:e34861. Available from:  
42 648 <http://www.pubmedcentral.nih.gov/articlerender.fcgi?artid=3342314&tool=pmcentrez&renderty>  
43 649 [pe=abstract](http://www.pubmedcentral.nih.gov/articlerender.fcgi?artid=3342314&tool=pmcentrez&renderty)  
44 650 12. Galesloot TE, van Steen K, Kiemeny LALM, Janss LL, Vermeulen SH. A comparison of  
45 651 multivariate genome-wide association methods. *PLoS One* [Internet]. 2014 [cited 2014 Sep  
46 652 20];9:e95923. Available from: <http://www.ncbi.nlm.nih.gov/pubmed/24763738>  
47 653 13. Shen X, Klarić L, Sharapov S, Mangino M, Ning Z, Wu D, et al. Multivariate discovery and  
48 654 replication of five novel loci associated with Immunoglobulin G N-glycosylation. *Nat Commun*  
49 655 [Internet]. 2017;8:447. Available from: <http://www.nature.com/articles/s41467-017-00453-3>

- 657 14. Schaid DJ, Tong X, Larrabee B, Kennedy RB, Poland GA, Sinnwell JP. Statistical Methods  
658 for Testing Genetic Pleiotropy. *Genetics* [Internet]. 2016;204:483–97. Available from:  
659 <http://www.genetics.org/cgi/doi/10.1534/genetics.116.189308>
- 660 15. Deng Y, Pan W. Conditional analysis of multiple quantitative traits based on marginal GWAS  
661 summary statistics. *Genet Epidemiol* [Internet]. 2017;41:427–36. Available from:  
662 <http://www.ncbi.nlm.nih.gov/pubmed/28464407>
- 663 16. Cox DR, Hinkley D V. Theoretical statistics. 1974. London, Chapman Hall. 1:511.
- 664 17. Smith GD, Ebrahim S. “Mendelian randomization”: can genetic epidemiology contribute to  
665 understanding environmental determinants of disease? *Int J Epidemiol* [Internet]. 2003;32:1–22.  
666 Available from: <http://www.ncbi.nlm.nih.gov/pubmed/12689998>
- 667 18. Krumsiek J, Suhre K, Illig T, Adamski J, Theis FJ. Gaussian graphical modeling reconstructs  
668 pathway reactions from high-throughput metabolomics data. *BMC Syst Biol* [Internet]. BioMed  
669 Central Ltd; 2011 [cited 2013 May 23];5:21. Available from:  
670 <http://www.pubmedcentral.nih.gov/articlerender.fcgi?artid=3224437&tool=pmcentrez&renderty>  
671 [pe=abstract](#)
- 672 19. Tsepilov YA, Shin S-Y, Soranzo N, Spector TD, Prehn C, Adamski J, et al. Nonadditive  
673 Effects of Genes in Human Metabolomics. *Genetics* [Internet]. 2015;200:707–18. Available from:  
674 <http://www.genetics.org/cgi/doi/10.1534/genetics.115.175760>
- 675 20. Xie W, Wood AR, Lyssenko V, Weedon MN, Knowles JW, Alkayyali S, et al. Genetic variants  
676 associated with glycine metabolism and their role in insulin sensitivity and type 2 diabetes.  
677 *Diabetes* [Internet]. 2013;62:2141–50. Available from:  
678 <http://www.ncbi.nlm.nih.gov/pubmed/23378610>
- 679 21. Shin S-Y, Fauman EB, Petersen A-K, Krumsiek J, Santos R, Huang J, et al. An atlas of genetic  
680 influences on human blood metabolites. *Nat Genet* [Internet]. 2014 [cited 2014 May 12];46:543–  
681 50. Available from: <http://www.nature.com/doi/10.1038/ng.2982>
- 682 22. Falconer DS, Mackay TFC. *Introduction to Quantitative Genetics* (4th Edition) [Internet]. 4th  
683 ed. Pearson; 1996. Available from:  
684 <http://www.amazon.com/exec/obidos/redirect?tag=citeulike07-20&path=ASIN/0582243025>
- 685 23. Cheverud JM. A COMPARISON OF GENETIC AND PHENOTYPIC CORRELATIONS.  
686 *Evolution* [Internet]. 1988;42:958–68. Available from:  
687 <http://www.ncbi.nlm.nih.gov/pubmed/28581166>
- 688 24. Roff DA. The estimation of genetic correlations from phenotypic correlations: a test of  
689 Cheverud’s conjecture. *Heredity* (Edinb) [Internet]. 1995;74:481–90. Available from:  
690 <http://www.nature.com/articles/hdy199568>
- 691 25. Lynch M, Walsh B, others. *Genetics and analysis of quantitative traits*. Sinauer Sunderland,  
692 MA; 1998.
- 693 26. Bulik-Sullivan B, Finucane HK, Anttila V, Gusev A, Day FR, Loh P-R, et al. An atlas of  
694 genetic correlations across human diseases and traits. *Nat Genet*. Nature Publishing Group;  
695 2015;47:1236–41.
- 696 27. Zhu Z, Zhang F, Hu H, Bakshi A, Robinson MR, Powell JE, et al. Integration of summary data  
697 from GWAS and eQTL studies predicts complex trait gene targets. *Nat Genet* [Internet].  
698 2016;48:481–7. Available from:  
699 <http://www.nature.com/doi/10.1038/ng.3538>  
700 <http://www.ncbi.nlm.nih.gov/pubmed/27019110>
- 701 28. Pickrell JK, Berisa T, Liu JZ, Séguérel L, Tung JY, Hinds DA. Detection and interpretation of  
702 shared genetic influences on 42 human traits. *Nat Genet*. 2016;019885.
- 703 29. Giambartolomei C, Vukcevic D, Schadt EE, Franke L, Hingorani AD, Wallace C, et al.  
704 Bayesian Test for Colocalisation between Pairs of Genetic Association Studies Using Summary  
705 Statistics. Williams SM, editor. *PLoS Genet* [Internet]. 2014;10:e1004383. Available from:  
706 <http://dx.plos.org/10.1371/journal.pgen.1004383>
- 707 30. Aschard H, Guillemot V, Vilhjalmsón B, Patel CJ, Skurnik D, Ye CJ, et al. Covariate selection  
708 for association screening in multiphenotype genetic studies. *Nat Genet* [Internet]. 2017;49:1789–

709 95. Available from: <http://www.nature.com/doi/10.1038/ng.3975>

710 31. Wichmann H-E, Gieger C, Illig T. KORA-gen--resource for population genetics, controls and  
711 a broad spectrum of disease phenotypes. *Gesundheitswesen* [Internet]. 2005 [cited 2013 Jun 6];67  
712 Suppl 1:S26-30. Available from: <http://www.ncbi.nlm.nih.gov/pubmed/16032514>

713 32. Illig T, Gieger C, Zhai G, Römisch-Margl W, Wang-Sattler R, Prehn C, et al. A genome-wide  
714 perspective of genetic variation in human metabolism. *Nat Genet* [Internet]. Nature Publishing  
715 Group; 2010 [cited 2013 May 23];42:137–41. Available from:  
716 <http://www.ncbi.nlm.nih.gov/pubmed/20037589>

717 33. Kolz M, Johnson T, Sanna S, Teumer A, Vitart V, Perola M, et al. Meta-analysis of 28,141  
718 individuals identifies common variants within five new loci that influence uric acid concentrations.  
719 *PLoS Genet* [Internet]. 2009 [cited 2013 May 30];5:e1000504. Available from:  
720 <http://www.pubmedcentral.nih.gov/articlerender.fcgi?artid=2683940&tool=pmcentrez&rendertype=abstract>

721  
722 34. Kim S. ppcor: An R Package for a Fast Calculation to Semi-partial Correlation Coefficients.  
723 *Commun Stat Appl Methods* [Internet]. 2015;22:665–74. Available from:  
724 <http://www.csam.or.kr/journal/view.html?doi=10.5351/CSAM.2015.22.6.665>

725 35. Marchetti GM. Independencies Induced from a Graphical Markov Model after Marginalization  
726 and Conditioning: The R Package ggm. *J Stat Softw* [Internet]. 2006;15. Available from:  
727 <http://www.jstatsoft.org/v15/i06/>

728 36. Fabregat-Traver D, Sharapov SZ, Hayward C, Rudan I, Campbell H, Aulchenko Y, et al. High-  
729 Performance Mixed Models Based Genome-Wide Association Analysis with omicABEL  
730 software. *F1000Research* [Internet]. 2014;3:200. Available from:  
731 <http://f1000research.com/articles/3-200/v1>

732 37. Beasley TM, Erickson S, Allison DB. Rank-based inverse normal transformations are  
733 increasingly used, but are they merited? *Behav Genet* [Internet]. 2009 [cited 2013 Nov 7];39:580–  
734 95. Available from:  
735 <http://www.pubmedcentral.nih.gov/articlerender.fcgi?artid=2921808&tool=pmcentrez&rendertype=abstract>

736  
737 38. Devlin B, Roeder K. Genomic control for association studies. *Biometrics* [Internet]. 1999  
738 [cited 2013 Jun 5];55:997–1004. Available from: <http://www.ncbi.nlm.nih.gov/pubmed/11315092>

739 39. Pers TH, Karjalainen JM, Chan Y, Westra H-J, Wood AR, Yang J, et al. Biological  
740 interpretation of genome-wide association studies using predicted gene functions. *Nat Commun*  
741 [Internet]. 2015;6:5890. Available from: <http://www.ncbi.nlm.nih.gov/pubmed/25597830>

742 40. Staley JR, Blackshaw J, Kamat MA, Ellis S, Surendran P, Sun BB, et al. PhenoScanner: a  
743 database of human genotype–phenotype associations. *Bioinformatics* [Internet]. 2016;32:3207–9.  
744 Available from:  
745 <http://bioinformatics.oxfordjournals.org/lookup/doi/10.1093/bioinformatics/btw373>

746

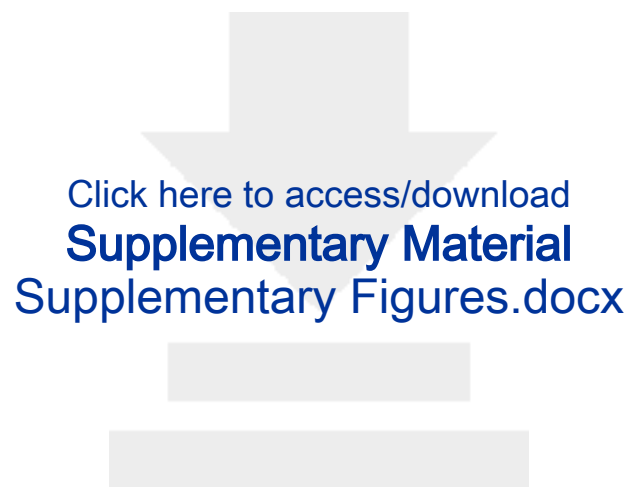

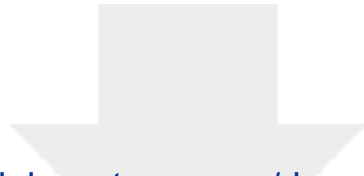

Click here to access/download  
**Supplementary Material**  
Supplementary Note 1.docx

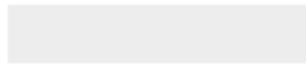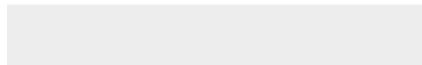



Click here to access/download  
**Supplementary Material**  
Supplementary Note 2.docx

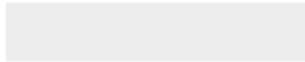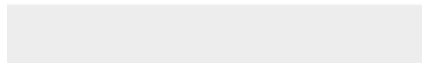

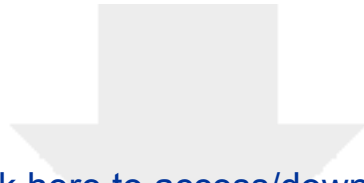

Click here to access/download  
**Supplementary Material**  
Supplementary Table 1\_new.xlsx

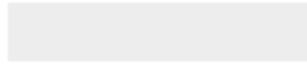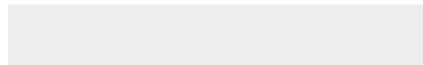



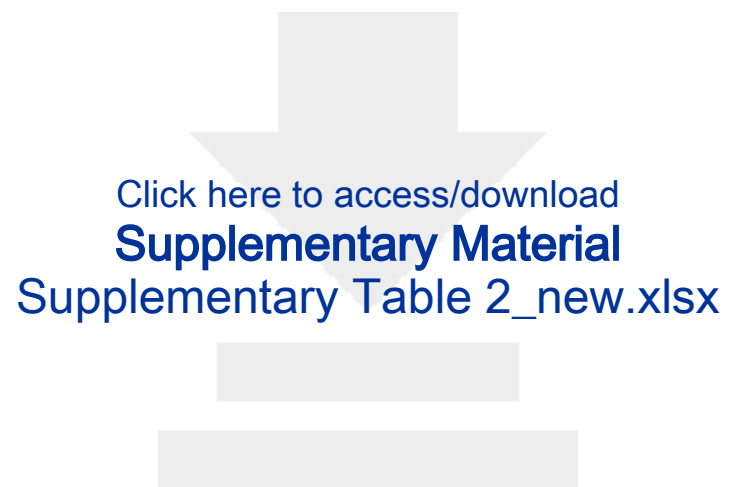

Click here to access/download  
**Supplementary Material**  
Supplementary Table 2\_new.xlsx

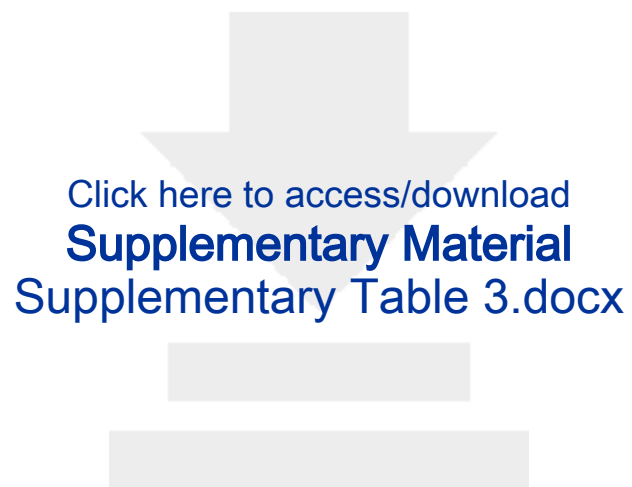

Click here to access/download  
**Supplementary Material**  
Supplementary Table 3.docx
